# Supplementary material for: Geometrically isomeric Pt2Ag2 acetylide complexes of 2,6-bis(diphenylphosphino)pyridine: luminescent and vapochromic properties
Source: Royal Society of Chemistry journal article supplement (doi:10.1039/d1qi00111f), 2021-01-01
Supplement: d1qi00111f1.pdf [file d1qi00111f1.pdf]

# Electronic Supporting Information

## Geometrically Isomeric Pt<sub>2</sub>Ag<sub>2</sub> Acetylide Complexes of 2,6-Bis(diphenylphosphino)pyridine: Luminescent and Vapochromic Properties

Jian Quan,<sup>a,c</sup> Zhong-Hui Chen,<sup>a</sup> Xu Zhang,<sup>a</sup> Jin-Yun Wang,<sup>a,\*</sup> Li-Yi Zhang,<sup>a</sup> and Zhong-Ning  
Chen<sup>a,b,\*</sup>

<sup>a</sup> *State Key Laboratory of Structural Chemistry, Fujian Institute of Research on the Structure of Matter, Chinese Academy of Sciences, Fuzhou, Fujian 350002, China. E-mail: czn@fjirsm.ac.cn*

<sup>b</sup> *Fujian Science & Technology Innovation Laboratory for Optoelectronic Information of China, Fuzhou, Fujian 350108, China*

<sup>c</sup> *University of Chinese Academy of Sciences, Beijing, 100039, China*

## Experimental Section

**General Procedures and Materials.** All operations were carried out under dry argon atmosphere by using Schlenk techniques at ambient temperature and vacuum-line system unless specified. The solvents were dried, distilled and degassed prior to use except those for spectroscopic measurements were of spectroscopic grade. Ag(tht)(SO<sub>3</sub>CF<sub>3</sub>), Pt(COD)Cl<sub>2</sub> (COD = 1,5-cycloocatadiene) and alkyne ligands were accessible by similar synthetic procedures in the literatures.<sup>1-3</sup> 2,6-Dichloropyridine, AgSbF<sub>6</sub>, HC≡CC<sub>6</sub>H<sub>5</sub>, and HC≡CC<sub>6</sub>H<sub>4</sub>CF<sub>3</sub>-4 were commercially available.

**2,6-Bis(diphenylphosphino)pyridine ((Ph<sub>2</sub>P)<sub>2</sub>py).** Ph<sub>2</sub>PCl (12 mL, 65 mmol) in THF (20 mL) was added slowly to THF (100 mL) with lithium (500 mg, 72 mmol). Upon stirring for 1 h, the reaction mixture gradually turned to deep red, which was then refluxed at 70 °C for 3 h. Upon cooling down, the excess Li was removed and the deep red solution was kept at 0 °C in an ice bath. To the solution was added dropwise a THF (30 mL) solution of 2,6-dichloropyridine (4.0 g, 27 mmol). The reaction mixture was warmed to room temperature and then refluxed at 70 °C for 1 h to give a pale-yellow suspension. Upon cooling to room temperature, the solvent was removed under reduced pressure and a saturated NH<sub>4</sub>Cl solution (60 mL) was added. The product was extracted with CH<sub>2</sub>Cl<sub>2</sub> (3 × 50 mL) and the combined organic layers were washed with saturated NaCl solution (50 mL) and dried with MgSO<sub>4</sub>. After concentrated under vacuum, the residue was purified by crystallization in ethanol as white solid. Yield: 80% (9.6 g). m.p.: 124-125 °C. Anal. Calcd for C<sub>29</sub>H<sub>23</sub>NP<sub>2</sub>: C, 77.84; H, 5.18; N, 3.13. Found: C, 77.67; H, 5.20; N, 3.09. <sup>1</sup>H NMR (400 MHz, CDCl<sub>3</sub>, ppm): 7.01 (m, 3,5-py-H, 2H), 7.08-7.48 (m, 4-Py-H, C<sub>6</sub>H<sub>5</sub>, 21H). <sup>31</sup>P NMR (162 MHz, CDCl<sub>3</sub>, ppm): -4.09 ppm. ESI-MS: m/z 448.6 ([M + H]<sup>+</sup>).

**Physical Measurements.** The <sup>1</sup>H and <sup>31</sup>P NMR spectra were measured on a Bruker Avance III (400 MHz) spectrometer. The UV-Vis absorption spectra were measured on a Perkin-Elmer Lambda 25 UV-vis spectrophotometer. The infrared spectra (IR) were recorded on a Magna 750 FT-IR spectrophotometer with KBr pellets. The elemental analyses (C, H, N) were carried out on a Perkin-Elmer model 240 C elemental analyzer. The electrospray ion mass spectra (ESI-MS) were recorded on a Finnigan DECAX-30000 LCQ mass spectrometer using dichloromethane/methanol as mobile phase. The emission and excitation spectra together with the emission lifetimes in various states were determined on an Edinburgh FLS920 fluorescence spectrometer. The emission quantum yield ( $\Phi_{em}$ ) in various states were determined by the integrating

sphere (142 mm in diameter) using an Edinburgh FLS920 Spectrofluorophotometer. The emission quantum yield ( $\Phi_{em}$ ) in degassed dichloromethane solution at room temperature was estimated using [Ru(bpy)<sub>3</sub>](PF<sub>6</sub>)<sub>2</sub> in acetonitrile as the reference standard ( $\Phi_{em} = 0.062$ ). Luminescence vapochromic experiments were performed upon sufficient exposure of the quartz slices to various saturated VOC vapors at ambient temperature for about 10 min. The PMMA films were made on quartz slides (2.5 cm × 4 cm) by spin-coating.

**Crystal Structural Determination.** Crystals suitable for X-ray crystallographic measurement were grown by layering n-heptane onto the corresponding solutions. Single crystals were measured on Rigaku Saturn 70 CCD or Bruker D8 VENTURE diffractometer by the  $\omega$  scan technique at room temperature using graphite-monochromated Mo-K $\alpha$  ( $\lambda = 0.71073 \text{ \AA}$ ) radiation. The CrystalClear or APEX III software package was used for data reduction and empirical absorption correction. The structures were solved by direct method and the heavy atoms were located from E-map. The remaining non-hydrogen atoms were determined from the successive difference Fourier syntheses. The non-hydrogen atoms were refined with anisotropic thermal parameters. The hydrogen atoms were generated geometrically with isotropic thermal parameters. The structures were refined on  $F^2$  by full-matrix least-squares method using the SHELXTL-97 program package.<sup>4</sup> In the crystal structure of **2b**·2.5MeCN, the solvate molecules were treated as a diffuse contribution to the overall scattering without specific atom positions by SQUEEZE/PLATON due to severe disorder of these solvate molecules in the lattices. The number of solvate molecules of crystal **2b**·2.5MeCN was calculated by void volume and residual electron density in crystal lattice, and further confirmed by weight loss according to thermogravimetry-mass spectrometry (TG-MS) analysis.

**Computational Methodology.** All the calculations were performed in Gaussian 09 program package.<sup>5</sup> Firstly, the geometrical structures as isolated molecules of **2b** in the ground state ( $G_0$ ) and **1b**, **2b** and **4b** in the lowest-energy triplet state ( $T_1$ ) were optimized, respectively, by the restricted and unrestricted density functional theory (DFT) method with the B3LYP functional.<sup>6</sup> The initial structures were extracted from the crystal structural parameters by X-ray crystallography. Then, in order to analyze the spectroscopic properties, 80 singlet (for **2b** based on the optimized  $G_0$  structure) and 6 triplet (for **1b**, **2b** and **4b** on the optimized  $T_1$  structures) excited states of these complexes were calculated by time-dependent DFT (TD-DFT) method<sup>7-9</sup> with the same functional used in the optimization process. The solvent effects of CH<sub>2</sub>Cl<sub>2</sub> was included by using the

polarizable continuum model method (PCM).<sup>10,11</sup> To understand deeply the emission properties of **2b** with different intramolecular conformations, the calculations of triplet excited state were also implemented for **2b**·3CH<sub>2</sub>Cl<sub>2</sub> and **2b**·2.5MeCN on the basis of the crystal structural data without geometrical optimization. In these calculations, the Stuttgart-Dresden (SDD) basis set and the effective core potentials (ECPs)<sup>12</sup> were used to describe the Pt and Ag atoms, while other non-metal atoms of P, F, O, N, C and H were described by the all-electron basis set of 6-31G\*\*. Visualization of the frontier molecular orbitals were performed by GaussView. The contributions of fragments to orbitals in the electronic excitation process were analysed by the Ros & Schuit method<sup>13</sup> (C-squared population analysis method, SCPA) in Multiwfn 3.8 program.<sup>14</sup>

**Table S1.** Crystallographic Data for cis-Pt<sub>2</sub>Ag<sub>2</sub> Complexes **2a** and **3a** and trans-Pt<sub>2</sub>Ag<sub>2</sub> Complexes **1b**·4CH<sub>2</sub>Cl<sub>2</sub>, **2b**, **2b**·3CH<sub>2</sub>Cl<sub>2</sub>, **2b**·2.5MeCN and **4b**.

|                                                                 | <b>2a</b> ·11/4CH <sub>2</sub> Cl <sub>2</sub>                                                                                                                       | <b>3a</b> ·5/2CH <sub>2</sub> Cl <sub>2</sub>                                                                                                                    | <b>1b</b> ·4CH <sub>2</sub> Cl <sub>2</sub>                                                                                                                     | <b>2b</b>                                                                                                                                     | <b>2b</b> ·3CH <sub>2</sub> Cl <sub>2</sub>                                                                                                                   | <b>2b</b> ·5/2MeCN                                                                                                                                | <b>4b</b>                                                                                                                                       |
|-----------------------------------------------------------------|----------------------------------------------------------------------------------------------------------------------------------------------------------------------|------------------------------------------------------------------------------------------------------------------------------------------------------------------|-----------------------------------------------------------------------------------------------------------------------------------------------------------------|-----------------------------------------------------------------------------------------------------------------------------------------------|---------------------------------------------------------------------------------------------------------------------------------------------------------------|---------------------------------------------------------------------------------------------------------------------------------------------------|-------------------------------------------------------------------------------------------------------------------------------------------------|
| chemical formula                                                | C <sub>94.75</sub> H <sub>71.5</sub> Ag <sub>2</sub> Cl <sub>5.5</sub><br>F <sub>6</sub> N <sub>2</sub> O <sub>6</sub> P <sub>4</sub> Pt <sub>2</sub> S <sub>2</sub> | C <sub>98.5</sub> H <sub>67</sub> Ag <sub>2</sub> Cl <sub>5</sub> F <sub>18</sub><br>N <sub>2</sub> O <sub>6</sub> P <sub>4</sub> Pt <sub>2</sub> S <sub>2</sub> | C <sub>108</sub> H <sub>98</sub> Ag <sub>2</sub> Cl <sub>8</sub><br>F <sub>6</sub> N <sub>2</sub> O <sub>18</sub> P <sub>4</sub> Pt <sub>2</sub> S <sub>2</sub> | C <sub>92</sub> H <sub>66</sub> Ag <sub>2</sub> F <sub>6</sub> N <sub>2</sub><br>O <sub>6</sub> P <sub>4</sub> Pt <sub>2</sub> S <sub>2</sub> | C <sub>95</sub> H <sub>72</sub> Ag <sub>2</sub> Cl <sub>6</sub> F <sub>6</sub><br>N <sub>2</sub> O <sub>6</sub> P <sub>4</sub> Pt <sub>2</sub> S <sub>2</sub> | C <sub>97</sub> H <sub>73.5</sub> Ag <sub>2</sub> F <sub>6</sub><br>N <sub>4.5</sub> O <sub>6</sub> P <sub>4</sub> Pt <sub>2</sub> S <sub>2</sub> | C <sub>100</sub> H <sub>58</sub> Ag <sub>2</sub> F <sub>30</sub><br>N <sub>2</sub> O <sub>6</sub> P <sub>4</sub> Pt <sub>2</sub> S <sub>2</sub> |
| formula weight                                                  | 2436.93                                                                                                                                                              | 2687.71                                                                                                                                                          | 2903.40                                                                                                                                                         | 2203.38                                                                                                                                       | 2458.16                                                                                                                                                       | 2306.02                                                                                                                                           | 2747.40                                                                                                                                         |
| Crystal system                                                  | orthorhombic                                                                                                                                                         | triclinic                                                                                                                                                        | triclinic                                                                                                                                                       | orthorhombic                                                                                                                                  | monoclinic                                                                                                                                                    | monoclinic                                                                                                                                        | monoclinic                                                                                                                                      |
| space group                                                     | <i>Pbca</i>                                                                                                                                                          | <i>P</i> $\bar{1}$                                                                                                                                               | <i>P</i> $\bar{1}$                                                                                                                                              | <i>C</i> 2221                                                                                                                                 | <i>P</i> 2 <sub>1</sub> / <i>c</i>                                                                                                                            | <i>P</i> 2 <sub>1</sub> / <i>n</i>                                                                                                                | <i>P</i> 2 <sub>1</sub> / <i>c</i>                                                                                                              |
| <i>T</i> (K)                                                    | 293(2)                                                                                                                                                               | 293(2)                                                                                                                                                           | 293(2)                                                                                                                                                          | 293(2)                                                                                                                                        | 100(2)                                                                                                                                                        | 150(2)                                                                                                                                            | 298(2)                                                                                                                                          |
| <i>a</i> (Å)                                                    | 13.6978(10)                                                                                                                                                          | 21.242(3)                                                                                                                                                        | 14.5178(2)                                                                                                                                                      | 19.271(2)                                                                                                                                     | 14.8764(6)                                                                                                                                                    | 13.9577(10)                                                                                                                                       | 27.930(4)                                                                                                                                       |
| <i>b</i> (Å)                                                    | 27.641(2)                                                                                                                                                            | 25.331(3)                                                                                                                                                        | 15.031(2)                                                                                                                                                       | 19.620(2)                                                                                                                                     | 41.6942(17)                                                                                                                                                   | 25.4328(17)                                                                                                                                       | 13.1649(16)                                                                                                                                     |
| <i>c</i> (Å)                                                    | 50.357(4)                                                                                                                                                            | 25.716(4)                                                                                                                                                        | 16.7816(3)                                                                                                                                                      | 22.773(3)                                                                                                                                     | 16.0997(6)                                                                                                                                                    | 25.5005(14)                                                                                                                                       | 26.744(4)                                                                                                                                       |
| $\alpha$ (°)                                                    |                                                                                                                                                                      | 117.242(6)                                                                                                                                                       | 115.005(4)                                                                                                                                                      |                                                                                                                                               |                                                                                                                                                               |                                                                                                                                                   |                                                                                                                                                 |
| $\beta$ (°)                                                     |                                                                                                                                                                      | 94.361(11)                                                                                                                                                       | 111.540(7)                                                                                                                                                      |                                                                                                                                               | 116.1220(10)                                                                                                                                                  | 102.251(2)                                                                                                                                        | 104.657(2)                                                                                                                                      |
| $\gamma$ (°)                                                    |                                                                                                                                                                      | 109.512(8)                                                                                                                                                       | 92.567(6)                                                                                                                                                       |                                                                                                                                               |                                                                                                                                                               |                                                                                                                                                   |                                                                                                                                                 |
| <i>V</i> (Å <sup>3</sup> )                                      | 19066(3)                                                                                                                                                             | 11155(3)                                                                                                                                                         | 2998.87(17)                                                                                                                                                     | 14245                                                                                                                                         | 8966.0(6)                                                                                                                                                     | 8846.1(10)                                                                                                                                        | 9514(2)                                                                                                                                         |
| <i>Z</i>                                                        | 8                                                                                                                                                                    | 4                                                                                                                                                                | 1                                                                                                                                                               | 4                                                                                                                                             | 4                                                                                                                                                             | 4                                                                                                                                                 | 4                                                                                                                                               |
| density (g/cm <sup>3</sup> )                                    | 1.698                                                                                                                                                                | 1.600                                                                                                                                                            | 1.608                                                                                                                                                           | 1.700                                                                                                                                         | 1.821                                                                                                                                                         | 1.731                                                                                                                                             | 1.918                                                                                                                                           |
| $\mu$ (mm <sup>-1</sup> )                                       | 3.660                                                                                                                                                                | 3.139                                                                                                                                                            | 2.984                                                                                                                                                           | 3.878                                                                                                                                         | 3.907                                                                                                                                                         | 3.779                                                                                                                                             | 3.565                                                                                                                                           |
| <i>R</i> <sub>int</sub>                                         | 0.0406                                                                                                                                                               | 0.1229                                                                                                                                                           | 0.0342                                                                                                                                                          | 0.0558                                                                                                                                        | 0.362                                                                                                                                                         | 0.0792                                                                                                                                            | 0.0435                                                                                                                                          |
| <i>R</i> <sub>1</sub> <sup>a</sup> [ <i>I</i> >2σ( <i>I</i> )]  | 0.0524                                                                                                                                                               | 0.0820                                                                                                                                                           | 0.0438                                                                                                                                                          | 0.0352                                                                                                                                        | 0.0741                                                                                                                                                        | 0.0483                                                                                                                                            | 0.0374                                                                                                                                          |
| <i>wR</i> <sub>2</sub> <sup>b</sup> [ <i>I</i> >2σ( <i>I</i> )] | 0.1416                                                                                                                                                               | 0.2084                                                                                                                                                           | 0.1252                                                                                                                                                          | 0.0898                                                                                                                                        | 0.1724                                                                                                                                                        | 0.1105                                                                                                                                            | 0.1128                                                                                                                                          |
| GOF                                                             | 1.083                                                                                                                                                                | 1.023                                                                                                                                                            | 1.042                                                                                                                                                           | 1.036                                                                                                                                         | 1.169                                                                                                                                                         | 1.039                                                                                                                                             | 0.849                                                                                                                                           |

<sup>a</sup> $R_1 = \sum ||F_o| - |F_c|| / \sum |F_o|$ ,    <sup>b</sup> $wR_2 = [\sum w(|F_o| - |F_c|)^2 / \sum w|F_o|^2]^{1/2}$ .

**Table S2.** Selected Interatomic Distances (Å) and Bond Angles (°) for cis-Pt<sub>2</sub>Ag<sub>2</sub> Complexes **2a** and **3a** and trans-Pt<sub>2</sub>Ag<sub>2</sub> Complexes **2b**, **2b**·3CH<sub>2</sub>Cl<sub>2</sub> and **2b**·2.5MeCN.

| <b>2a</b> ·11/4CH <sub>2</sub> Cl <sub>2</sub> |            | <b>3a</b> ·5/2CH <sub>2</sub> Cl <sub>2</sub> |            | <b>2b</b>    |            | <b>2b</b> ·3CH <sub>2</sub> Cl <sub>2</sub> |           | <b>2b</b> ·5/2MeCN |            |
|------------------------------------------------|------------|-----------------------------------------------|------------|--------------|------------|---------------------------------------------|-----------|--------------------|------------|
| Pt1-Ag1                                        | 3.1251(6)  | Pt1-Ag1                                       | 3.0975(11) | Pt1-Ag1      | 2.9648(6)  | Pt1-Ag1                                     | 2.9352(7) | Pt1-Ag1            | 3.0862(6)  |
| Pt1-Ag2                                        | 3.0607(6)  | Pt1-Ag2                                       | 3.0606(11) |              |            | Pt1-Ag2                                     | 2.9942(8) | Pt1-Ag1a           | 3.1521(6)  |
| Pt2-Ag1                                        | 3.0811(6)  | Pt2-Ag1                                       | 3.2940(12) | Pt2-Ag1      | 2.9992(6)  | Pt2-Ag1                                     | 3.0587(8) | Pt2-Ag2            | 3.0349(6)  |
| Pt2-Ag2                                        | 2.9921(6)  | Pt2-Ag2                                       | 2.9298(11) |              |            | Pt2-Ag2                                     | 2.9873(8) | Pt2-Ag2a           | 3.0500(6)  |
| Ag1-Ag2                                        | 3.0234(8)  | Ag1-Ag2                                       | 3.0611(15) |              |            |                                             |           |                    |            |
| Pt1-C59                                        | 2.011(6)   | Pt1-C117                                      | 2.036(10)  | Pt1-C30      | 2.013(6)   | Pt1-C59                                     | 2.001(9)  | Pt1-C1             | 2.005(6)   |
| Pt1-C67                                        | 2.004(6)   | Pt1-C126                                      | 1.990(11)  |              |            | Pt1-C67                                     | 2.008(9)  | Pt1-C9             | 1.997(6)   |
| Pt1-P1                                         | 2.3290(15) | Pt1-P1                                        | 2.342(3)   | Pt1-P1       | 2.3082(16) | Pt1-P1                                      | 2.307(2)  | Pt1-P1             | 2.3097(16) |
| Pt1-P3                                         | 2.3314(15) | Pt1-P3                                        | 2.307(3)   |              |            | Pt1-P2                                      | 2.313(2)  | Pt1-P2             | 2.3156(16) |
| Pt2-C75                                        | 2.019(6)   | Pt2-C135                                      | 2.003(11)  | Pt2-C38      | 2.006(7)   | Pt2-C75                                     | 1.994(9)  | Pt2-C46            | 2.008(6)   |
| Pt2-C83                                        | 2.006(6)   | Pt2-C144                                      | 2.031(14)  |              |            | Pt2-C83                                     | 2.024(10) | Pt2-C54            | 2.002(5)   |
| Pt2-P2                                         | 2.3229(15) | Pt2-P2                                        | 2.321(3)   | Pt2-P2       | 2.3063(18) | Pt2-P3                                      | 2.311(2)  | Pt2-P3             | 2.3162(14) |
| Pt2-P4                                         | 2.3062(14) | Pt2-P4                                        | 2.320(3)   |              |            | Pt2-P4                                      | 2.311(2)  | Pt2-P4             | 2.3077(14) |
| Ag1-C67                                        | 2.281(6)   | Ag1-C117                                      | 2.270(7)   | Ag1-C30      | 2.290(5)   | Ag1-C59                                     | 2.323(9)  | Ag1-C1             | 2.301(5)   |
| Ag1-C75                                        | 2.254(6)   | Ag1-C135                                      | 2.282(10)  | Ag1-C38      | 2.359(7)   | Ag1-C75                                     | 2.296(9)  | Ag1-C9             | 2.288(5)   |
| Ag2-C59                                        | 2.259(6)   | Ag2-C126                                      | 2.324(7)   | Ag2-C83      | 2.329(9)   | Ag2-C67                                     | 2.338(9)  | Ag2-C46            | 2.346(5)   |
| Ag2-C83                                        | 2.322(6)   | Ag2-C144                                      | 2.341(8)   |              |            |                                             |           | Ag2-C54            | 2.341(5)   |
| Ag2-N2                                         | 2.626(5)   | Ag2-N2                                        | 2.379(8)   |              |            |                                             |           |                    |            |
| C67-Pt1-P3                                     | 170.37(17) | C117-Pt1-P3                                   | 173.9(3)   | C30-Pt1-C30a | 175.3(3)   | C59-Pt1-C67                                 | 167.7(4)  | C1-Pt1-C9          | 169.7(2)   |
| C59-Pt1-P1                                     | 174.78(17) | C126-Pt1-P1                                   | 169.5(3)   | P1-Pt1-P1a   | 171.14(8)  | P1-Pt1-P2                                   | 172.32(8) | P1-Pt1-P2          | 170.82(5)  |
| C75-Pt2-P4                                     | 176.84(18) | C135-Pt2-P4                                   | 175.4(3)   | C38-Pt2-C38  | 164.7(4)   | C75-Pt2-C83                                 | 170.5(4)  | C54-Pt2-C46        | 167.0(2)   |
| C83-Pt2-P2                                     | 170.61(16) | C144-Pt2-P2                                   | 169.6(2)   | P2-Pt2-P2a   | 170.73(9)  | P3-Pt2-P4                                   | 168.90(8) | P4-Pt2-P3          | 171.98(5)  |
| C75-Ag1-C6                                     | 174.1(2)   | C117-Ag1-C135                                 | 156.2(3)   | C30-Ag1-C38  | 161.7(2)   | C75-Ag1-C5                                  | 165.9(3)  | C9-Ag1-C1          | 168.4(2)   |
| C59-Ag2-C8                                     | 153.2(2)   | C126-Ag2-C144                                 | 127.8(3)   |              |            | C83-Ag2-C6                                  | 163.7(3)  | C54-Ag2-C4         | 154.64(19) |
| C59-Ag2-N2                                     | 90.24(17)  | C126-Ag2-N2                                   | 112.3(3)   |              |            |                                             |           |                    |            |
| C83-Ag2-N2                                     | 112.20(18) | C144-Ag2-N2                                   | 117.5(4)   |              |            |                                             |           |                    |            |

**Table S3.** The Partial Molecular Orbital Compositions (%) by SCPA Approach (C-squared Population Analysis Proposed by Ros & Schuit) in the Ground State and Absorption Transitions for cis-Pt<sub>2</sub>Ag<sub>2</sub> complex **2a** in CH<sub>2</sub>Cl<sub>2</sub> Solution Calculated by the TD-DFT Method at the B3LYP Level.

| orbital | energy (eV) | MO contribution (%) |                  |                                  |                                     |
|---------|-------------|---------------------|------------------|----------------------------------|-------------------------------------|
|         |             | Pt (s/p/d)          | Ag (s/p/d)       | C≡CC <sub>6</sub> H <sub>5</sub> | (Ph <sub>2</sub> P) <sub>2</sub> py |
| LUMO    | -2.60       | 19.60 (30/58/13)    | 19.88 (47/49/4)  | 38.35                            | 22.17                               |
| HOMO    | -6.50       | 11.42 (2/5/93)      | 31.18 (48/4/48)  | 53.45                            | 3.95                                |
| HOMO-1  | -6.73       | 15.30 (16/9/74)     | 14.48 (41/15/44) | 64.05                            | 6.18                                |
| HOMO-3  | -6.91       | 24.58 (10/4/86)     | 16.75 (58/11/31) | 53.06                            | 5.61                                |

| state          | <i>E</i> , nm (eV) | O.S.   | transition (contrib.) | assignment                                          | measured (nm) |
|----------------|--------------------|--------|-----------------------|-----------------------------------------------------|---------------|
| S <sub>1</sub> | 373 (3.32)         | 0.2274 | HOMO→LUMO (96%)       | <sup>1</sup> MC/ <sup>1</sup> IL/ <sup>1</sup> LLCT | 359           |
| S <sub>2</sub> | 350 (3.54)         | 0.2566 | HOMO-1→LUMO (92%)     | <sup>1</sup> MC/ <sup>1</sup> IL/ <sup>1</sup> LLCT | 340           |
| S <sub>5</sub> | 330 (3.76)         | 0.2639 | HOMO-3→LUMO (92%)     | <sup>1</sup> MC/ <sup>1</sup> IL/ <sup>1</sup> LLCT |               |

**Table S4.** The Partial Molecular Orbital Compositions (%) by SCPA Approach in the Lowest-Energy Triplet State and Emission Transitions for for cis-Pt<sub>2</sub>Ag<sub>2</sub> complex **2a** in CH<sub>2</sub>Cl<sub>2</sub> Solution Calculated by TD-DFT Method at the B3LYP Level.

| orbital | energy (eV) | MO contribution (%) |                  |                                  |                                     |
|---------|-------------|---------------------|------------------|----------------------------------|-------------------------------------|
|         |             | Pt (s/p/d)          | Ag (s/p/d)       | C≡CC <sub>6</sub> H <sub>5</sub> | (Ph <sub>2</sub> P) <sub>2</sub> py |
| LUMO    | -3.07       | 24.63 (14/30/56)    | 12.67 (64/29/7)  | 32.81                            | 29.89                               |
| HOMO    | -6.19       | 23.29 (9/6/85)      | 18.42 (5/9/86)   | 51.96                            | 6.34                                |
| H-1     | -6.55       | 9.33 (5/9/87)       | 27.12 (45/12/44) | 58.93                            | 4.62                                |
| H-2     | -6.69       | 13.90 (11/9/80)     | 13.71 (36/22/41) | 66.37                            | 6.02                                |
| H-3     | -6.89       | 17.18 (10/8/81)     | 17.52 (57/11/32) | 58.91                            | 6.39                                |

| state          | <i>E</i> , nm (eV) | O.S.   | transition (contrib.) | assignment                                                             | measured (nm) |
|----------------|--------------------|--------|-----------------------|------------------------------------------------------------------------|---------------|
| T <sub>1</sub> | 646 (1.92)         | 0.0000 | HOMO→LUMO (83%)       | <sup>3</sup> MC/ <sup>3</sup> IL/ <sup>3</sup> LLCT                    | 642           |
| T <sub>2</sub> | 456 (2.72)         | 0.0000 | H-1→LUMO (51%)        | <sup>3</sup> MC/ <sup>3</sup> IL/ <sup>3</sup> LLCT                    |               |
|                |                    |        | H-2→LUMO (9%)         | <sup>3</sup> IL/ <sup>3</sup> MC/ <sup>3</sup> LLCT/ <sup>3</sup> LMCT |               |
| T <sub>3</sub> | 446 (2.78)         | 0.0000 | H-3→LUMO (46%)        | <sup>3</sup> MC/ <sup>3</sup> IL/ <sup>3</sup> LLCT                    |               |

**Table S5.** The Partial Molecular Orbital Compositions (%) by SCPA Approach (C-squared Population Analysis Proposed by Ros & Schuit) in the Ground State and Absorption Transitions for for trans-Pt<sub>2</sub>Ag<sub>2</sub> complex **2b** in CH<sub>2</sub>Cl<sub>2</sub> Solution Calculated by the TD-DFT Method at the B3LYP Level.

| orbital | energy (eV) | MO contribution (%) |                 |                                  |                                     |
|---------|-------------|---------------------|-----------------|----------------------------------|-------------------------------------|
|         |             | Pt (s/p/d)          | Ag (s/p/d)      | C≡CC <sub>6</sub> H <sub>5</sub> | (Ph <sub>2</sub> P) <sub>2</sub> py |
| LUMO+6  | -1.80       | 17.86 (46/15/39)    | 14.39 (92/6/1)  | 7.46                             | 60.29                               |
| LUMO+1  | -2.29       | 17.32 (37/30/32)    | 6.10 (68/23/9)  | 8.78                             | 67.80                               |
| LUMO    | -2.91       | 29.69 (43/23/34)    | 10.33 (46/48/6) | 23.27                            | 36.71                               |
| HOMO    | -6.41       | 21.90 (0/6/94)      | 28.29 (64/3/34) | 47.65                            | 2.15                                |
| HOMO-1  | -6.48       | 30.19 (0/3/97)      | 6.01 (13/46/41) | 61.67                            | 2.14                                |
| HOMO-3  | -6.99       | 20.53 (39/3/58)     | 19.26 (38/9/53) | 53.95                            | 6.26                                |
| HOMO-4  | -7.14       | 66.99 (27/1/72)     | 7.21 (4/1/95)   | 10.62                            | 15.17                               |

| state           | <i>E</i> , nm (eV) | O.S.   | transition (contrib.)                  | assignment                                                                                                 | measured (nm) |
|-----------------|--------------------|--------|----------------------------------------|------------------------------------------------------------------------------------------------------------|---------------|
| S <sub>1</sub>  | 424 (2.92)         | 0.0272 | HOMO→LUMO (96%)                        | <sup>1</sup> MC/ <sup>1</sup> LLCT/ <sup>1</sup> IL                                                        |               |
| S <sub>2</sub>  | 419 (2.96)         | 0.4510 | HOMO-1→LUMO (94%)                      | <sup>1</sup> LLCT/ <sup>1</sup> MC/ <sup>1</sup> IL                                                        | 397           |
| S <sub>4</sub>  | 361 (3.43)         | 0.1354 | HOMO-4→LUMO (72%)<br>HOMO-3→LUMO (18%) | <sup>1</sup> MC/ <sup>1</sup> MLCT/ <sup>1</sup> IL<br><sup>1</sup> MC/ <sup>1</sup> LLCT/ <sup>1</sup> IL |               |
| S <sub>7</sub>  | 350 (3.54)         | 0.0922 | HOMO→LUMO+1 (75%)                      | <sup>1</sup> LLCT/ <sup>1</sup> MLCT/ <sup>1</sup> MC                                                      |               |
| S <sub>26</sub> | 307 (4.03)         | 0.1570 | HOMO→LUMO+6 (61%)                      | <sup>1</sup> LLCT/ <sup>1</sup> MC/ <sup>1</sup> MLCT                                                      | 319           |

**Table S6.** The Molecular Orbital Compositions (%) by SCPA Approach in the Lowest-Energy Triplet State and Emission Transitions for trans-Pt<sub>2</sub>Ag<sub>2</sub> complex **2b** in CH<sub>2</sub>Cl<sub>2</sub> Solution TD-DFT Method at the B3LYP Level.

| orbital | energy (eV) | MO Contribution (%) |                  |                                  |                                     |
|---------|-------------|---------------------|------------------|----------------------------------|-------------------------------------|
|         |             | Pt (s/p/d)          | Ag (s/p/d)       | C≡CC <sub>6</sub> H <sub>5</sub> | (Ph <sub>2</sub> P) <sub>2</sub> py |
| LUMO+1  | -2.44       | 31.77 (37/19/45)    | 3.12 (30/38/31)  | 23.34                            | 41.76                               |
| LUMO    | -3.40       | 31.96 (43/24/33)    | 17.56 (76/20/4)  | 19.35                            | 31.12                               |
| HOMO    | -5.93       | 27.16 (0/3/97)      | 16.09 (3/8/88)   | 55.56                            | 1.19                                |
| HOMO-1  | -6.49       | 19.64 (0/4/96)      | 27.88 (67/20/13) | 50.77                            | 1.72                                |
| HOMO-2  | -6.69       | 32.84 (27/7/66)     | 13.42 (0/5/95)   | 44.23                            | 9.51                                |

| state          | <i>E</i> , nm (eV) | O.S.   | transition (contrib.)                  | assignment                                                                                                 | measured (nm) |
|----------------|--------------------|--------|----------------------------------------|------------------------------------------------------------------------------------------------------------|---------------|
| T <sub>1</sub> | 661 (1.87)         | 0.0000 | HOMO→LUMO (94%)                        | <sup>3</sup> MC/ <sup>3</sup> LLCT/ <sup>3</sup> IL                                                        | 643           |
| T <sub>2</sub> | 567 (2.19)         | 0.0000 | HOMO-1→LUMO (71%)<br>HOMO→LUMO+1 (18%) | <sup>3</sup> MC/ <sup>3</sup> LLCT/ <sup>3</sup> IL<br><sup>3</sup> MC/ <sup>3</sup> LLCT/ <sup>3</sup> IL |               |
| T <sub>3</sub> | 528 (2.35)         | 0.0000 | HOMO-2→LUMO (84%)                      | <sup>3</sup> MC/ <sup>3</sup> LLCT/ <sup>3</sup> IL                                                        |               |



**Table S7.** The Partial Molecular Orbital Compositions (%) by SCPA Approach in the Lowest-Energy Triplet State and Emission Transitions for trans-Pt<sub>2</sub>Ag<sub>2</sub> complex **1b** in CH<sub>2</sub>Cl<sub>2</sub> Solution Calculated by TD-DFT Method at the B3LYP Level.

| orbital | energy (eV) | MO contribution (%) |                 |                                                           |                                     |
|---------|-------------|---------------------|-----------------|-----------------------------------------------------------|-------------------------------------|
|         |             | Pt (s/p/d)          | Ag (s/p/d)      | C≡CC <sub>6</sub> H <sub>2</sub> (OMe) <sub>3-3,4,5</sub> | (Ph <sub>2</sub> P) <sub>2</sub> py |
| LUMO    | -3.31       | 31.77 (44/24/32)    | 16.48 (76/20/4) | 19.67                                                     | 32.08                               |
| HOMO    | -5.48       | 13.13 (1/3/96)      | 8.68 (14/16/69) | 77.09                                                     | 1.10                                |
| HOMO-1  | -5.68       | 7.14 (17/17/66)     | 19.66 (80/13/7) | 72.18                                                     | 1.02                                |
| HOMO-2  | -6.11       | 8.42 (20/19/62)     | 13.08 (71/9/20) | 76.13                                                     | 2.38                                |

| state          | <i>E</i> , nm (eV) | O.S.   | transition (contrib.) | assignment                                            | measured (nm) |
|----------------|--------------------|--------|-----------------------|-------------------------------------------------------|---------------|
| T <sub>1</sub> | 712 (1.74)         | 0.0000 | HOMO→LUMO (92%)       | <sup>3</sup> LLCT/ <sup>3</sup> LMCT/ <sup>3</sup> MC | 705           |
| T <sub>2</sub> | 581 (2.13)         | 0.0000 | HOMO-1→LUMO (88%)     | <sup>3</sup> LLCT/ <sup>3</sup> MC/ <sup>3</sup> LMCT |               |
| T <sub>3</sub> | 564 (2.20)         | 0.0000 | HOMO-2→LUMO (76%)     | <sup>3</sup> LLCT/ <sup>3</sup> LMCT/ <sup>3</sup> MC |               |

**Table S8.** The Partial Molecular Orbital Compositions (%) by SCPA Approach in the Lowest-Energy Triplet State and Emission Transitions for trans-Pt<sub>2</sub>Ag<sub>2</sub> complex **4b** in CH<sub>2</sub>Cl<sub>2</sub> Solution Calculated by TD-DFT Method at the B3LYP Level.

| orbital | energy (eV) | MO contribution (%) |                  |                                                                      |                                     |
|---------|-------------|---------------------|------------------|----------------------------------------------------------------------|-------------------------------------|
|         |             | Pt (s/p/d)          | Ag (s/p/d)       | C≡CC <sub>6</sub> H <sub>3</sub> (CF <sub>3</sub> ) <sub>2-2,4</sub> | (Ph <sub>2</sub> P) <sub>2</sub> py |
| LUMO+1  | -2.79       | 20.22 (31/26/44)    | 4.77 (34/39/28)  | 52.09                                                                | 22.91                               |
| LUMO    | -3.60       | 32.88 (48/26/26)    | 20.50 (82/15/4)  | 22.16                                                                | 24.46                               |
| HOMO    | -6.37       | 28.83 (0/5/95)      | 18.42 (7/11/82)  | 51.79                                                                | 0.97                                |
| HOMO-1  | -6.92       | 21.76 (0/4/96)      | 19.34 (57/19/23) | 55.62                                                                | 3.29                                |
| HOMO-2  | -6.99       | 31.90 (21/6/73)     | 10.68 (1/3/96)   | 45.60                                                                | 11.82                               |
| HOMO-3  | -7.10       | 38.25 (18/3/79)     | 14.44 (7/3/90)   | 35.95                                                                | 11.36                               |

| state          | <i>E</i> , nm (eV) | O.S.   | transition (contrib.)                  | assignment                                                                                                                    | measured (nm) |
|----------------|--------------------|--------|----------------------------------------|-------------------------------------------------------------------------------------------------------------------------------|---------------|
| T <sub>1</sub> | 602 (2.06)         | 0.0000 | HOMO→LUMO (92%)                        | <sup>3</sup> MC/ <sup>3</sup> LLCT/ <sup>3</sup> IL                                                                           | 584           |
| T <sub>2</sub> | 538 (2.30)         | 0.0000 | HOMO-1→LUMO (60%)<br>HOMO→LUMO+1 (29%) | <sup>3</sup> MC/ <sup>3</sup> IL/ <sup>3</sup> LLCT/ <sup>3</sup> LMCT<br><sup>3</sup> IL/ <sup>3</sup> MLCT/ <sup>3</sup> MC |               |
| T <sub>3</sub> | 512 (2.42)         | 0.0000 | HOMO-2→LUMO (67%)<br>HOMO-3→LUMO (18%) | <sup>3</sup> MC/ <sup>3</sup> IL/ <sup>3</sup> LLCT/ <sup>3</sup> LMCT<br><sup>3</sup> MC/ <sup>3</sup> IL/ <sup>3</sup> LLCT |               |

**Table S9.** The Partial Molecular Orbital Compositions (%) by SCPA Approach in the Lowest-Energy Triplet State and Emission Transitions for Crystal **2b**·3CH<sub>2</sub>Cl<sub>2</sub> Calculated by TD-DFT Method at the B3LYP Level.

| orbital | energy (eV) | MO contribution (%) |                  |                                  |                                     |
|---------|-------------|---------------------|------------------|----------------------------------|-------------------------------------|
|         |             | Pt (s/p/d)          | Ag (s/p/d)       | C≡CC <sub>6</sub> H <sub>5</sub> | (Ph <sub>2</sub> P) <sub>2</sub> py |
| LUMO    | -6.26       | 34.99 (51/33/16)    | 16.79 (68/25/6)  | 14.72                            | 33.51                               |
| HOMO    | -9.54       | 25.89 (0/5/95)      | 15.08 (17/25/58) | 55.55                            | 3.49                                |
| HOMO-1  | -9.75       | 17.72 (1/7/92)      | 25.95 (61/7/32)  | 53.03                            | 3.30                                |
| HOMO-2  | -10.03      | 13.21 (24/11/65)    | 13.56 (41/7/52)  | 64.25                            | 8.98                                |

| state          | <i>E</i> , nm (eV) | O.S.   | transition (contrib.) | assignment                                            |
|----------------|--------------------|--------|-----------------------|-------------------------------------------------------|
| T <sub>1</sub> | 510 (2.43)         | 0.0000 | HOMO→LUMO (90%)       | <sup>3</sup> MC/ <sup>3</sup> LLCT/ <sup>3</sup> IL/  |
| T <sub>2</sub> | 468 (2.65)         | 0.0000 | HOMO-1→LUMO (83%)     | <sup>3</sup> MC/ <sup>3</sup> LLCT/ <sup>3</sup> IL   |
| T <sub>3</sub> | 418 (2.97)         | 0.0000 | HOMO-2→LUMO (78%)     | <sup>3</sup> MC/ <sup>3</sup> LLCT/ <sup>3</sup> LMCT |

**Table S10.** The Partial Molecular Orbital Compositions (%) by SCPA Approach in the Lowest-Energy Triplet State and Emission Transitions for Crystal **2b**·2.5MeCN Calculated by TD-DFT Method at the B3LYP Level.

| orbital | energy (eV) | MO Contribution (%) |                  |                                  |                                     |
|---------|-------------|---------------------|------------------|----------------------------------|-------------------------------------|
|         |             | Pt (s/p/d)          | Ag (s/p/d)       | C≡CC <sub>6</sub> H <sub>5</sub> | (Ph <sub>2</sub> P) <sub>2</sub> py |
| LUMO    | -6.48       | 29.63 (36/37/27)    | 14.59 (72/24/4)  | 14.72                            | 41.06                               |
| HOMO    | -9.55       | 22.11 (2/1/97)      | 14.10 (7/18/74)  | 60.50                            | 3.30                                |
| HOMO-1  | -9.78       | 9.89 (7/14/78)      | 5.20 (1/24/75)   | 75.11                            | 9.80                                |
| HOMO-3  | -9.99       | 17.02 (19/6/75)     | 21.01 (67/13/19) | 59.04                            | 2.93                                |

| state          | <i>E</i> , nm (eV) | O.S.   | transition (contrib.) | assignment                                                             |
|----------------|--------------------|--------|-----------------------|------------------------------------------------------------------------|
| T <sub>1</sub> | 550 (2.25)         | 0.0000 | HOMO→LUMO (90%)       | <sup>3</sup> LLCT/ <sup>3</sup> MC/ <sup>3</sup> IL                    |
| T <sub>2</sub> | 471 (2.63)         | 0.0000 | HOMO-1→LUMO (93%)     | <sup>3</sup> LLCT/ <sup>3</sup> LMCT/ <sup>3</sup> MC/ <sup>3</sup> IL |
| T <sub>3</sub> | 457 (2.71)         | 0.0000 | HOMO-3→LUMO (80%)     | <sup>3</sup> LLCT/ <sup>3</sup> MC/ <sup>3</sup> IL                    |

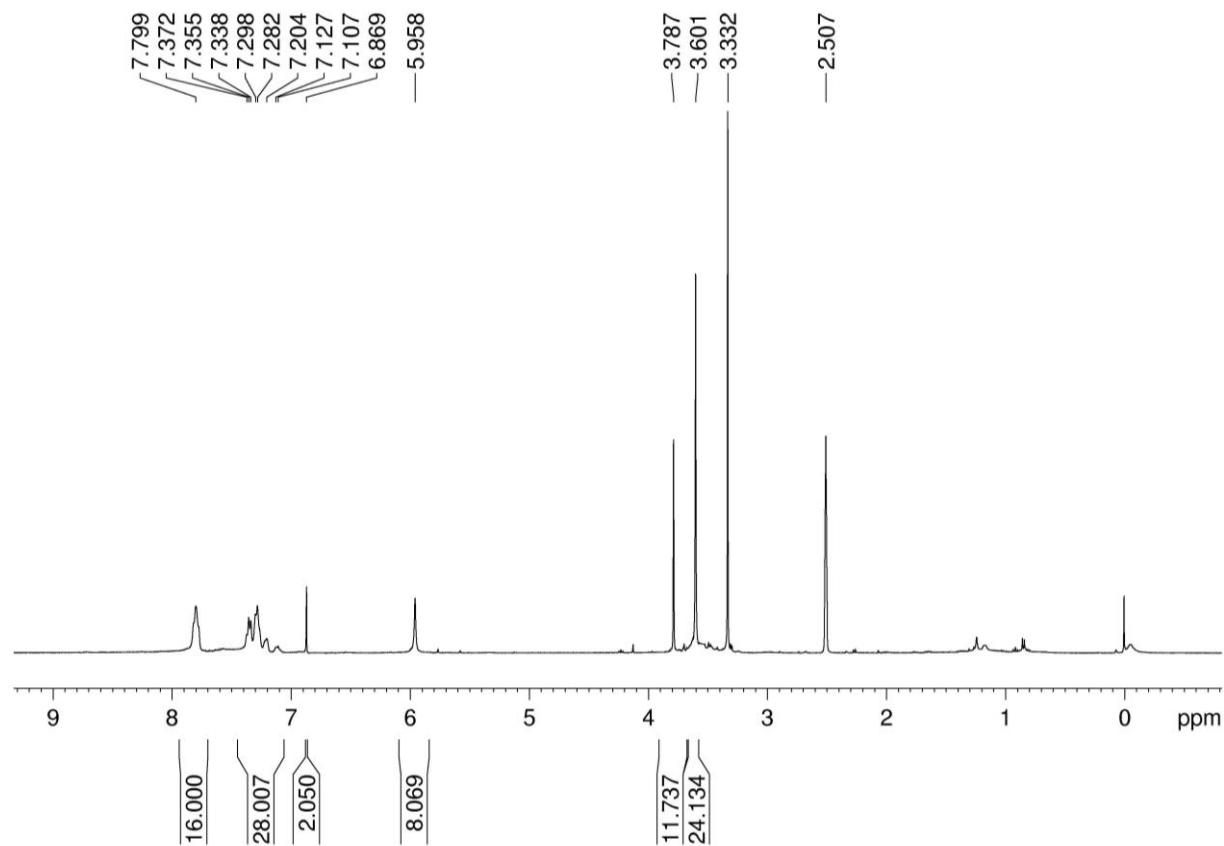

**Fig. S1**  $^1\text{H}$  NMR (400 MHz) spectrum of  $\text{cis-}[\text{Pt}_2\{(\text{Ph}_2\text{P})_2\text{py}\}_2\{\text{C}\equiv\text{CC}_6\text{H}_2(\text{OMe})_{3-3,4,5}\}_4]$  in  $d_6$ -DMSO.

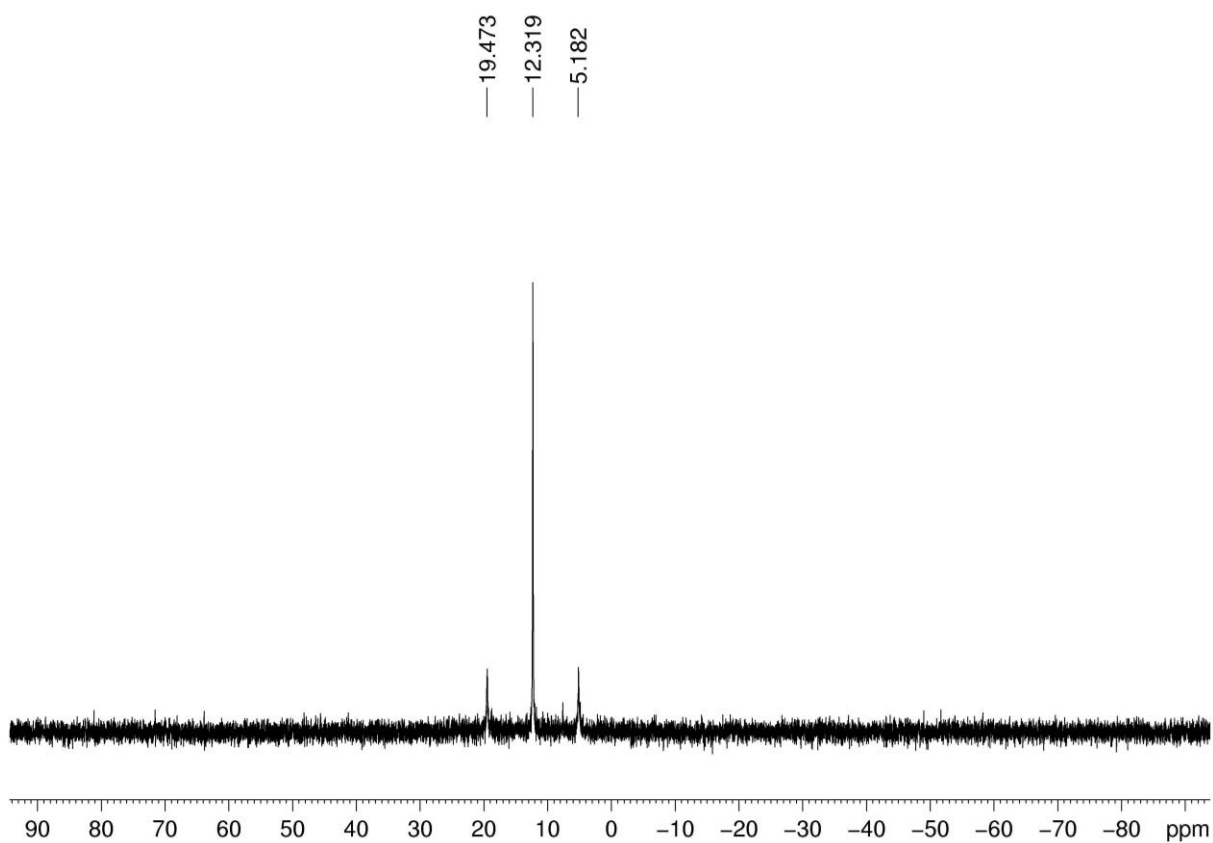

**Fig. S2**  $^{31}\text{P}$  NMR (162 MHz) spectrum of  $\text{cis-}[\text{Pt}_2\{(\text{Ph}_2\text{P})_2\text{py}\}_2\{\text{C}\equiv\text{CC}_6\text{H}_2(\text{OMe})_{3-3,4,5}\}_4]$  in  $d_6$ -DMSO.

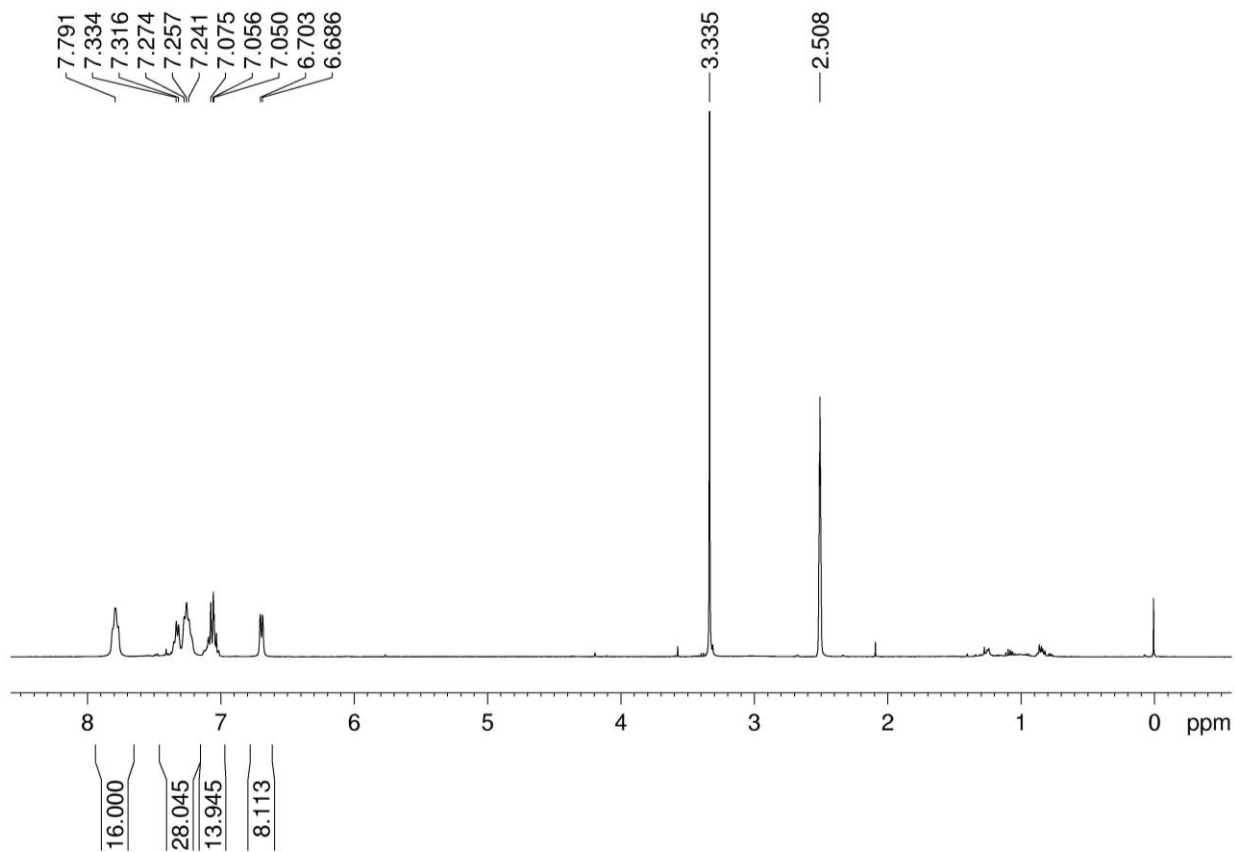

**Fig. S3**  $^1\text{H}$  NMR (400 MHz) spectrum of  $\text{cis-}[\text{Pt}_2\{(\text{Ph}_2\text{P})_2\text{py}\}_2(\text{C}\equiv\text{CC}_6\text{H}_5)_4]$  in  $d_6$ -DMSO.

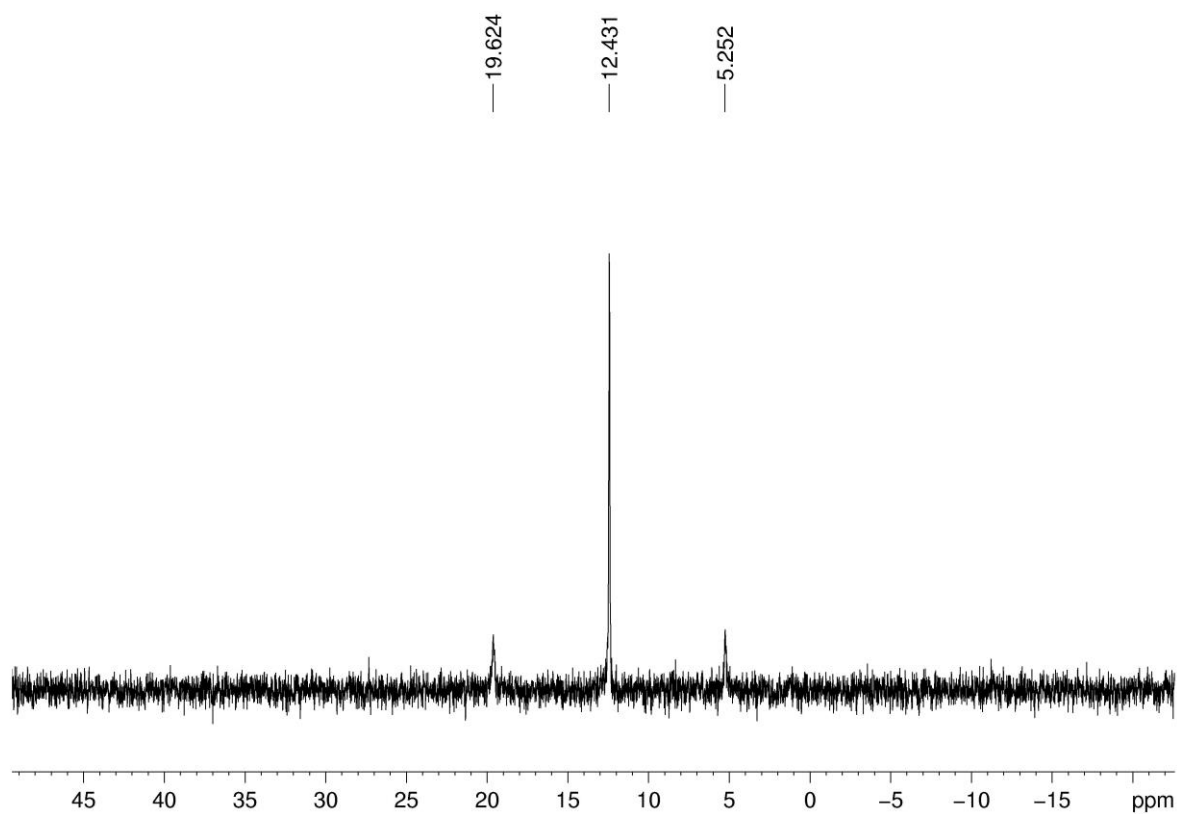

**Fig. S4**  $^{31}\text{P}$  NMR (162 MHz) spectrum of  $\text{cis-}[\text{Pt}_2\{(\text{Ph}_2\text{P})_2\text{py}\}_2(\text{C}\equiv\text{CC}_6\text{H}_5)_4]$  in  $d_6$ -DMSO.

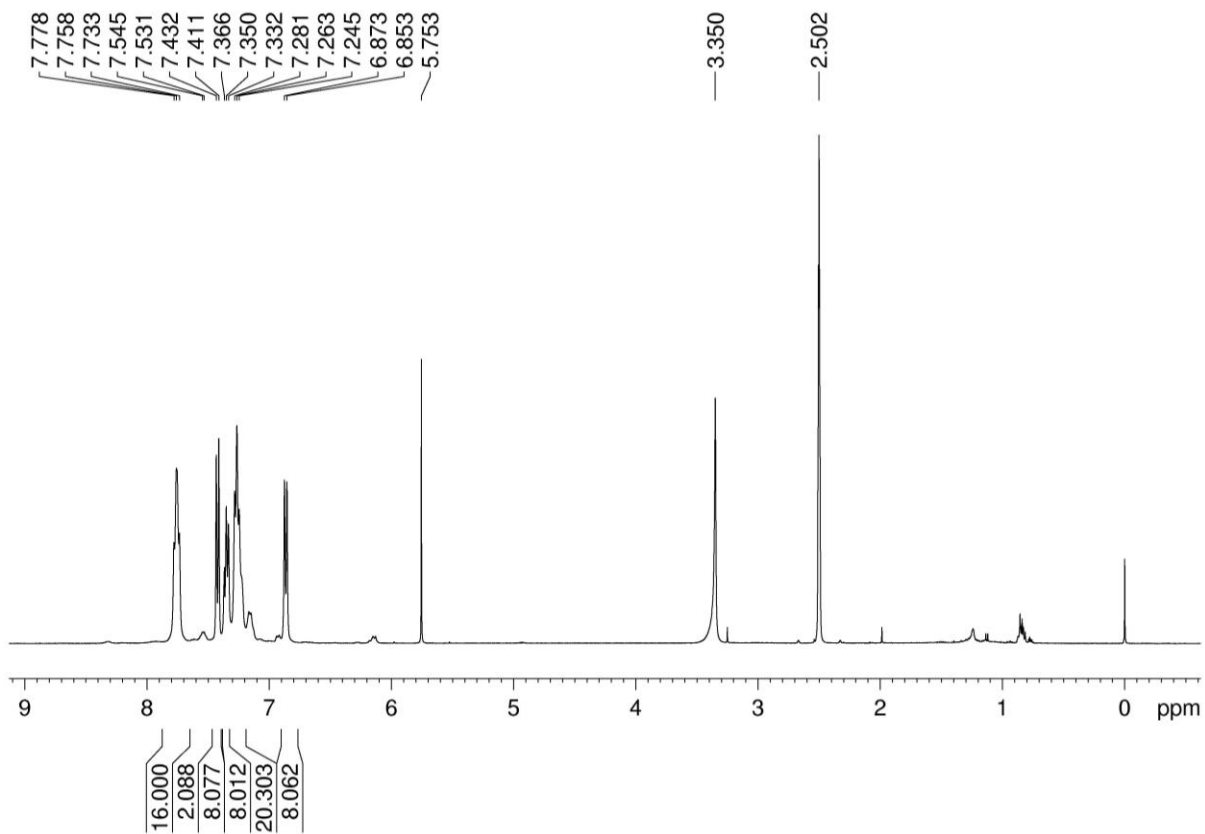

**Fig. S5**  $^1\text{H}$  NMR (400 MHz) spectrum of  $\text{cis-}[\text{Pt}_2\{(\text{Ph}_2\text{P})_2\text{py}\}_2(\text{C}\equiv\text{CC}_6\text{H}_4\text{CF}_3\text{-}4)_4]$  in  $d_6$ -DMSO.

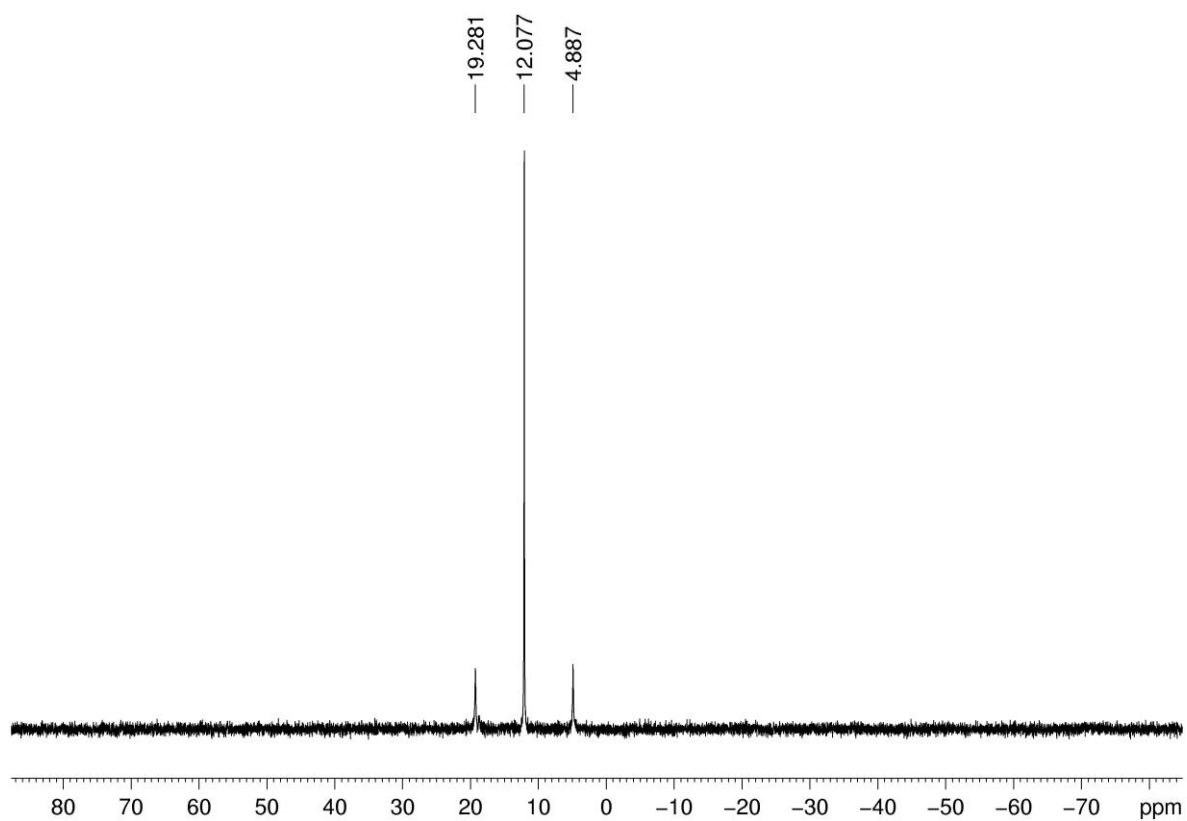

**Fig. S6**  $^{31}\text{P}$  NMR (162 MHz) spectrum of  $\text{cis-}[\text{Pt}_2\{(\text{Ph}_2\text{P})_2\text{py}\}_2(\text{C}\equiv\text{CC}_6\text{H}_4\text{CF}_3\text{-}4)_4]$  in  $d_6$ -DMSO.

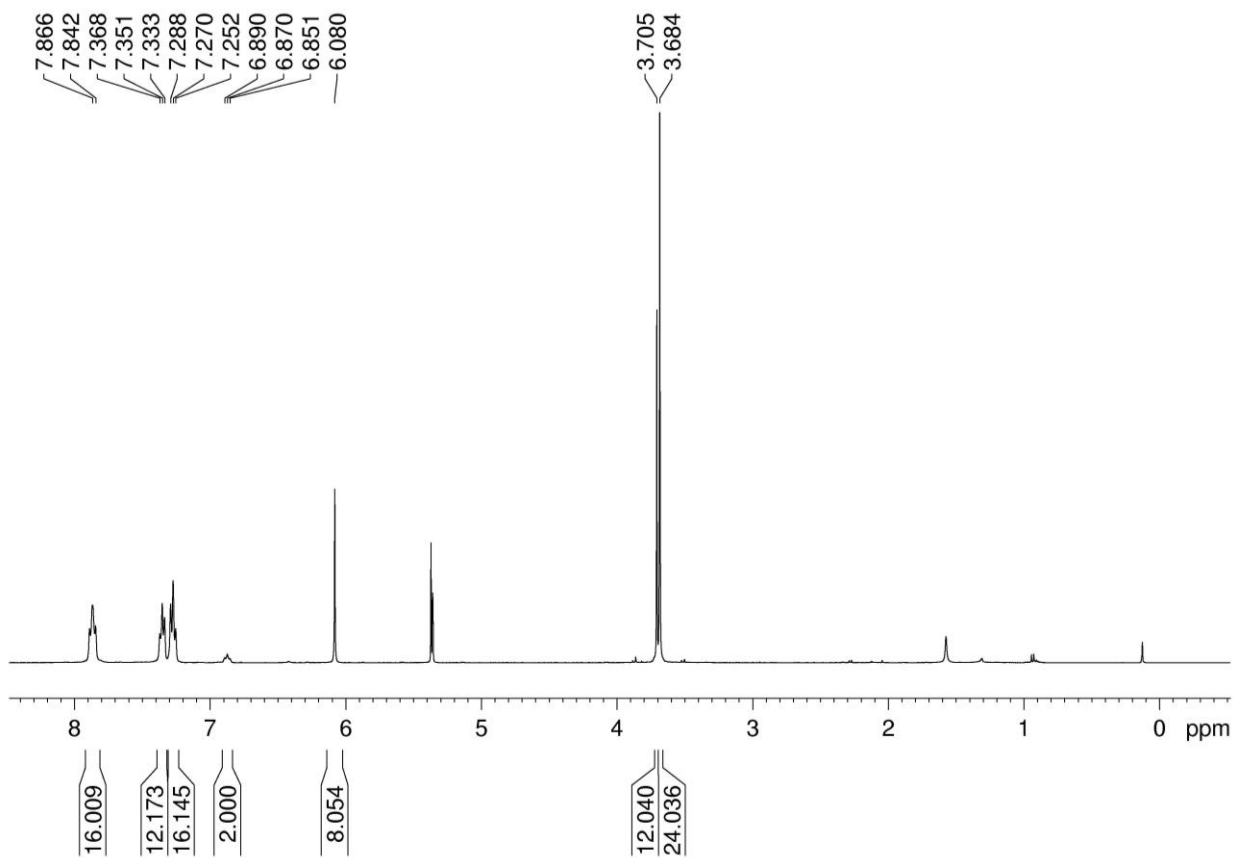

**Fig. S7**  $^1\text{H}$  NMR (400 MHz) spectrum of  $\text{cis-}[\text{Pt}_2\text{Ag}_2\{(\text{Ph}_2\text{P})_2\text{py}\}_2\{\text{C}\equiv\text{CC}_6\text{H}_2(\text{OMe})_{3-3,4,5}\}_4](\text{SO}_3\text{CF}_3)_2$  (**1a**) in  $\text{CD}_2\text{Cl}_2$ .

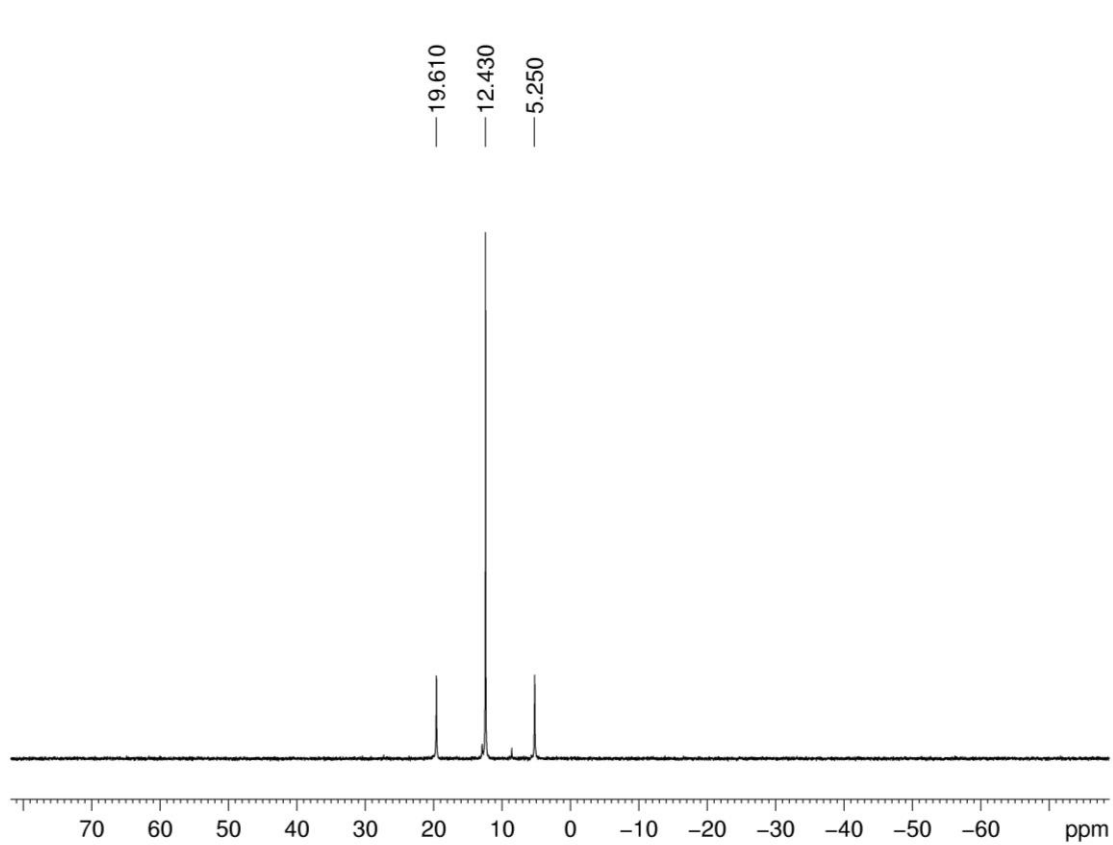

**Fig. S8**  $^{31}\text{P}$  NMR (162 MHz) spectrum of  $\text{cis-}[\text{Pt}_2\text{Ag}_2\{(\text{Ph}_2\text{P})_2\text{py}\}_2\{\text{C}\equiv\text{CC}_6\text{H}_2(\text{OMe})_{3-3,4,5}\}_4](\text{SO}_3\text{CF}_3)_2$  (**1a**) in  $\text{CD}_2\text{Cl}_2$ .

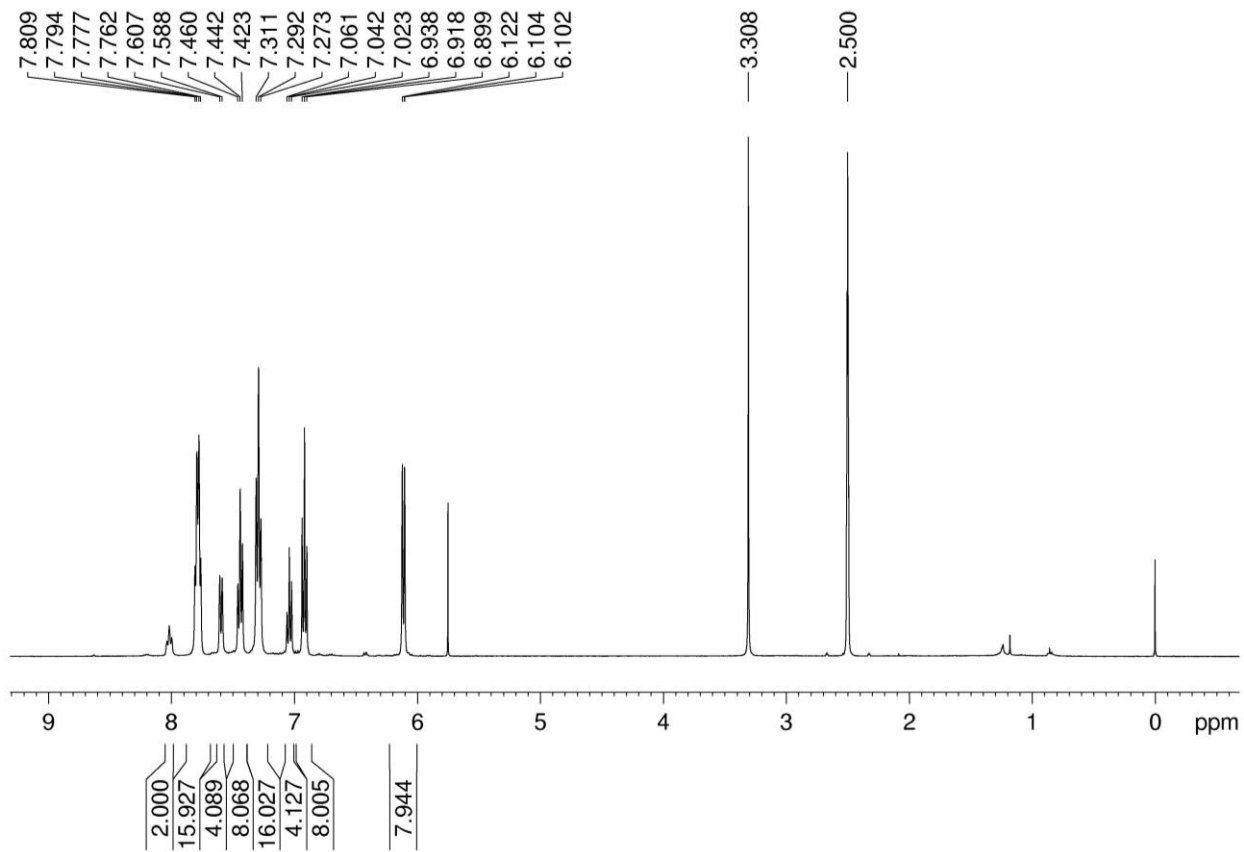

**Fig. S9**  $^1\text{H}$  NMR (400 MHz) spectrum of  $\text{cis-}[\text{Pt}_2\text{Ag}_2\{(\text{Ph}_2\text{P})_2\text{py}\}_2(\text{C}\equiv\text{CC}_6\text{H}_5)_4](\text{SO}_3\text{CF}_3)_2$  (**2a**) in  $d_6$ -DMSO.

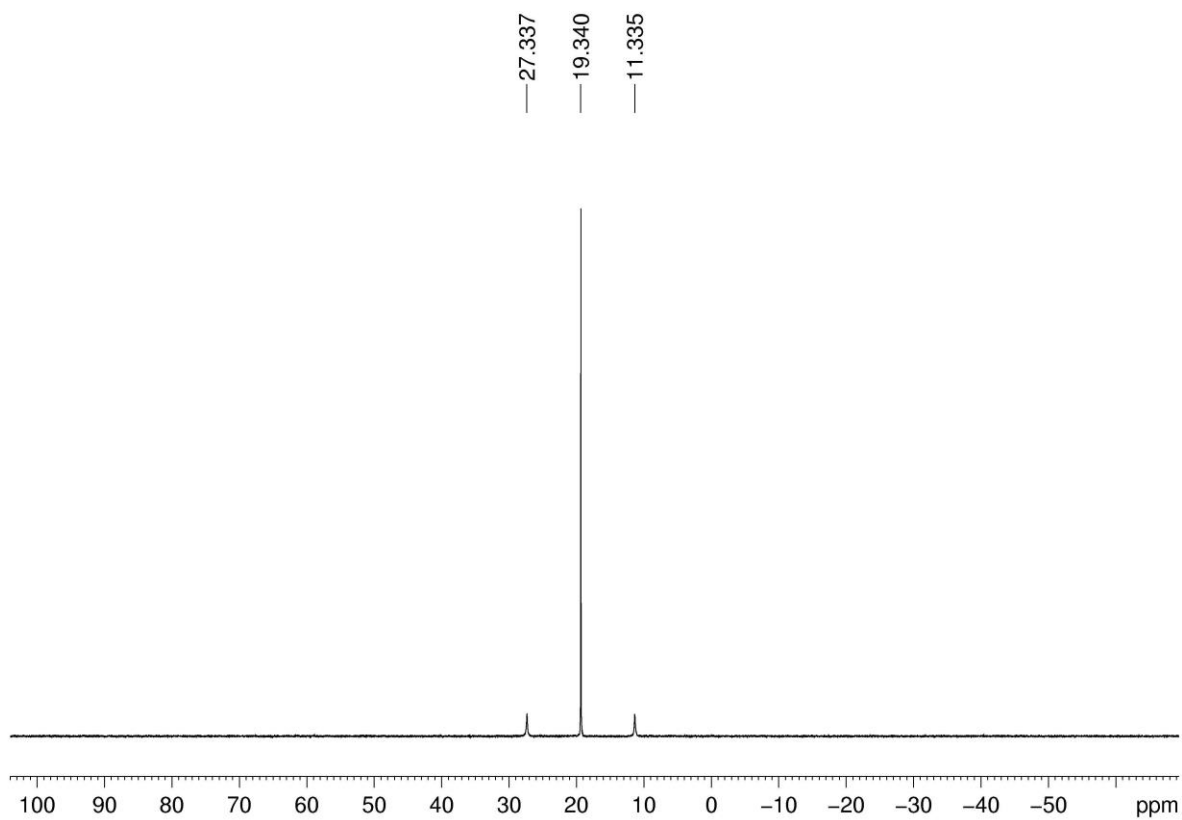

**Fig. S10**  $^{31}\text{P}$  NMR (162 MHz) spectrum of  $\text{cis-}[\text{Pt}_2\text{Ag}_2\{(\text{Ph}_2\text{P})_2\text{py}\}_2(\text{C}\equiv\text{CC}_6\text{H}_5)_4](\text{SO}_3\text{CF}_3)_2$  (**2a**) in  $d_6$ -DMSO.

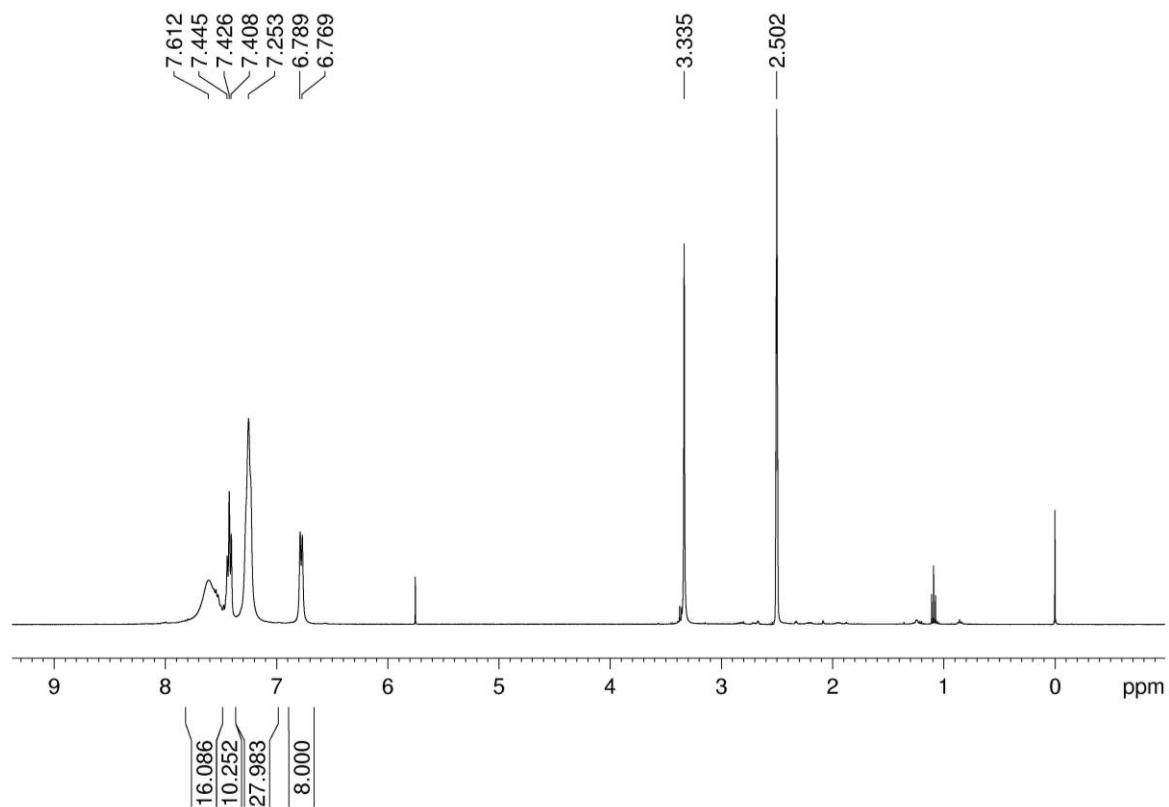

**Fig. S11**  $^1\text{H}$  NMR (400 MHz) spectrum of  $\text{cis-}[\text{Pt}_2\text{Ag}_2\{(\text{Ph}_2\text{P})_2\text{py}\}_2(\text{C}\equiv\text{CC}_6\text{H}_4\text{CF}_3\text{-4})_4](\text{SO}_3\text{CF}_3)_2$  (**3a**) in  $d_6$ -DMSO.

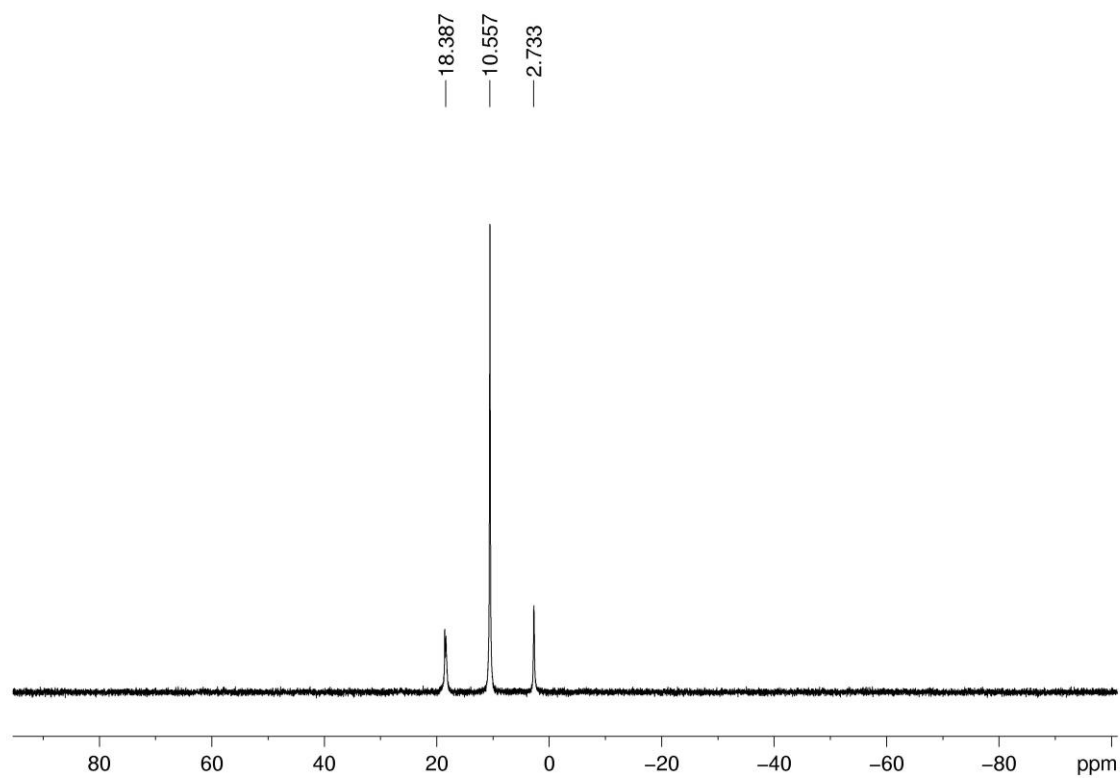

**Fig. S12**  $^{31}\text{P}$  NMR (162 MHz) spectrum of  $\text{cis-}[\text{Pt}_2\text{Ag}_2\{(\text{Ph}_2\text{P})_2\text{py}\}_2(\text{C}\equiv\text{CC}_6\text{H}_4\text{CF}_3\text{-4})_4](\text{SO}_3\text{CF}_3)_2$  (**3a**) in  $d_6$ -DMSO.



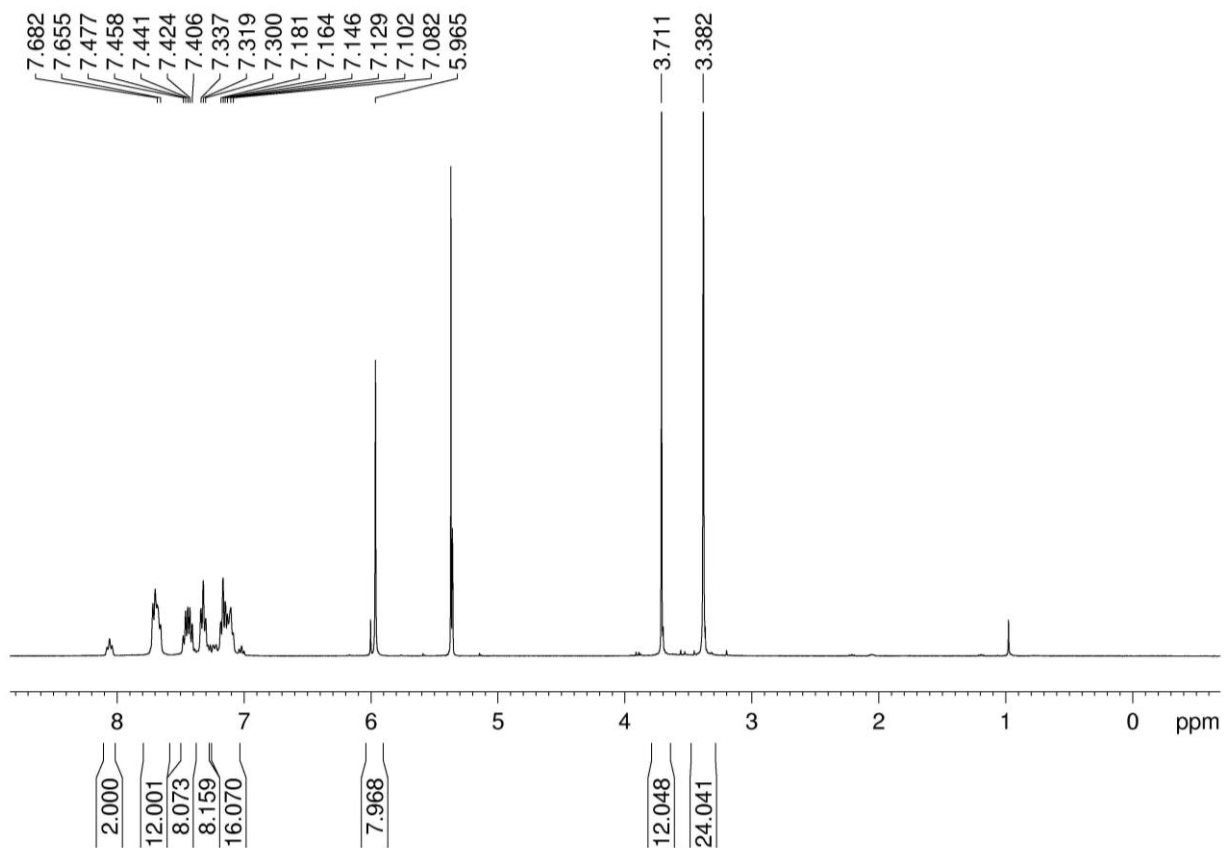

**Fig. S13**  $^1\text{H}$  NMR (400 MHz) spectrum of  $\text{trans-}[\text{Pt}_2\text{Ag}_2\{(\text{Ph}_2\text{P})_2\text{py}\}_2(\text{C}\equiv\text{CC}_6\text{H}_2(\text{OMe})_{3-3,4,5})_4](\text{SO}_3\text{CF}_3)_2$  (**1b**) in  $\text{CD}_2\text{Cl}_2$ .

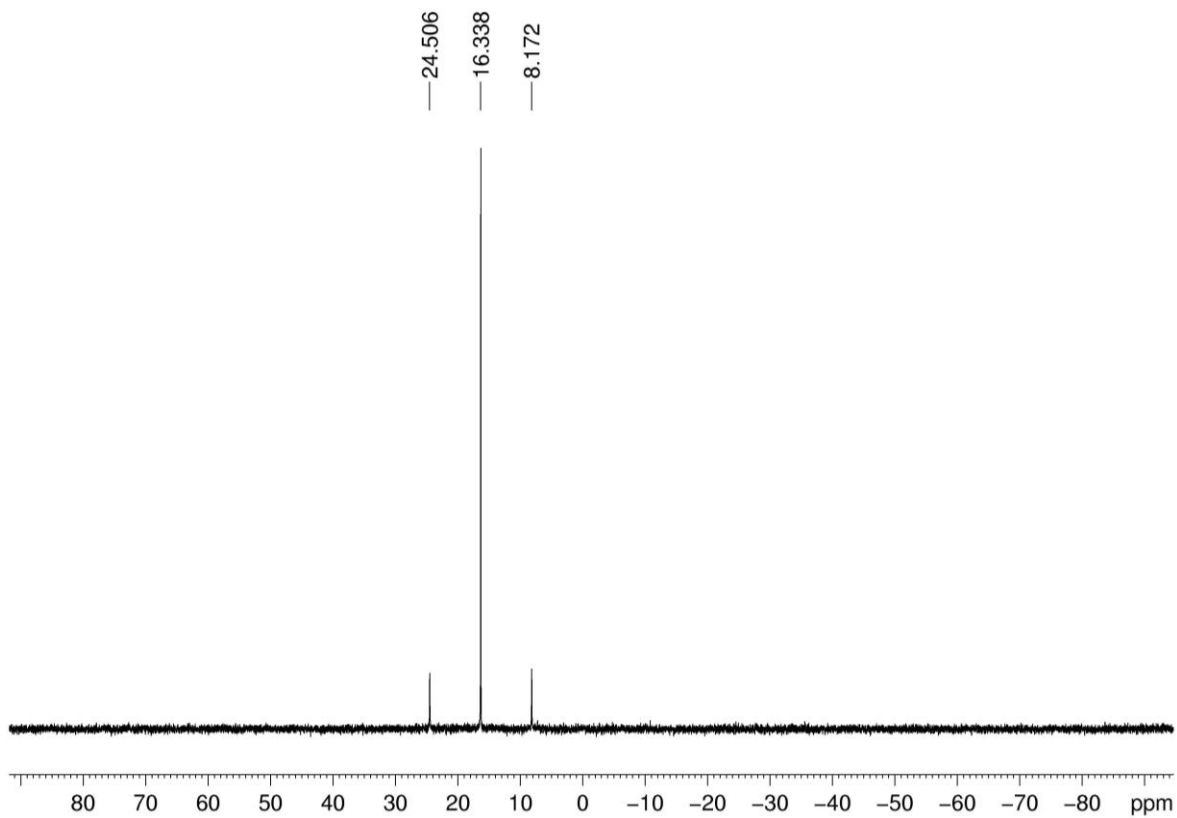

**Fig. S14**  $^{31}\text{P}$  NMR (162 MHz) spectrum of  $\text{trans-}[\text{Pt}_2\text{Ag}_2\{(\text{Ph}_2\text{P})_2\text{py}\}_2(\text{C}\equiv\text{CC}_6\text{H}_2(\text{OMe})_{3-3,4,5})_4](\text{SO}_3\text{CF}_3)_2$  (**1b**) in  $\text{CD}_2\text{Cl}_2$ .

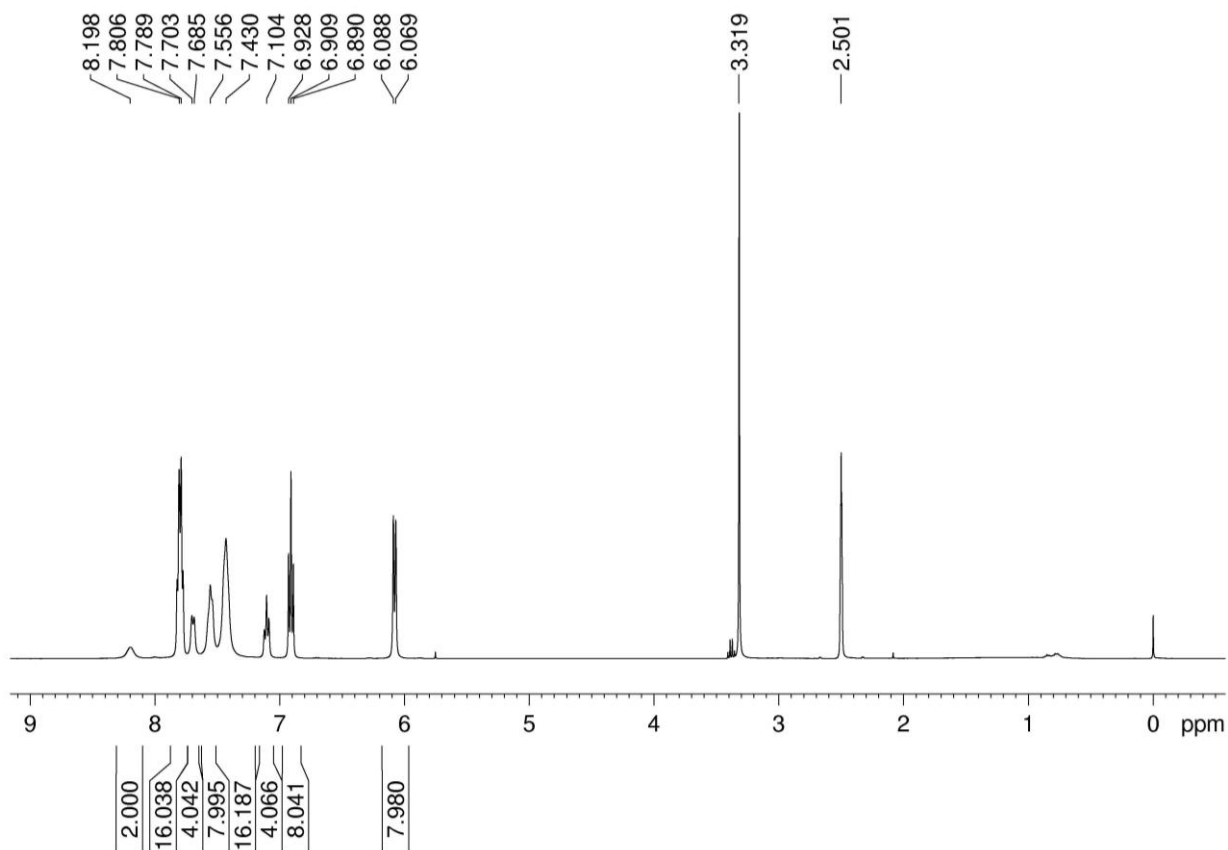

**Fig. S15**  $^1\text{H}$  NMR (400 MHz) spectrum of  $\text{trans-}[\text{Pt}_2\text{Ag}_2\{(\text{Ph}_2\text{P})_2\text{py}\}_2(\text{C}\equiv\text{CC}_6\text{H}_5)_4](\text{SO}_3\text{CF}_3)_2$  (**2b**) in  $d_6$ -DMSO.

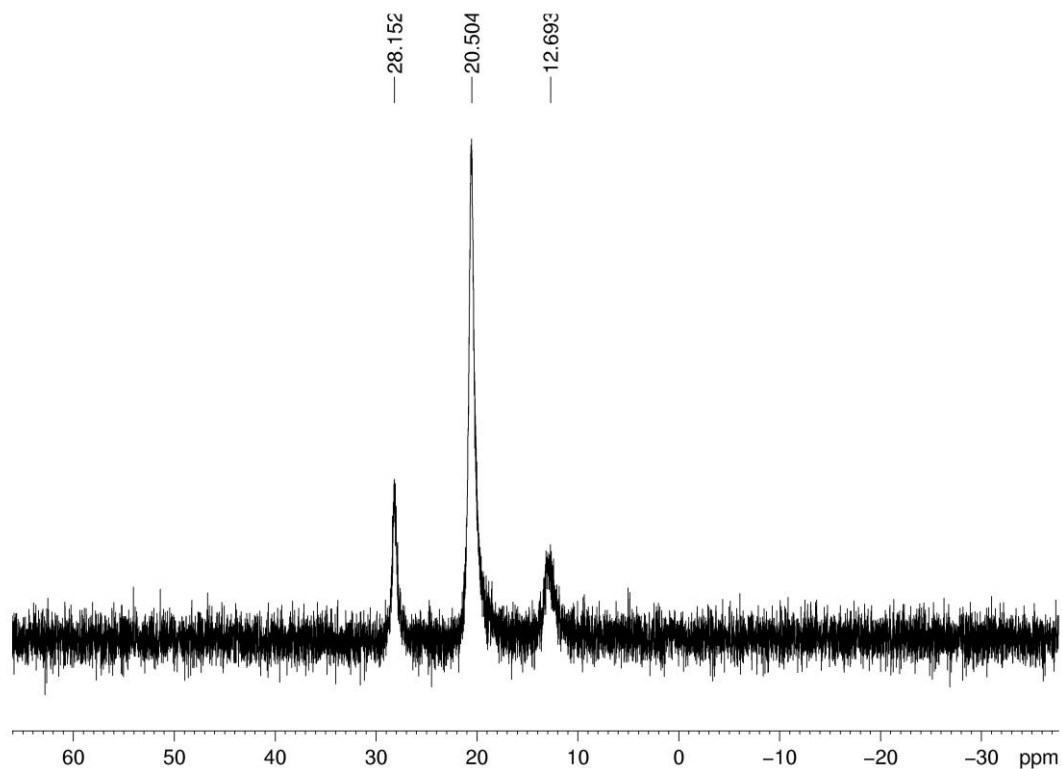

**Fig. S16**  $^{31}\text{P}$  NMR (162 MHz) spectrum of  $\text{trans-}[\text{Pt}_2\text{Ag}_2\{(\text{Ph}_2\text{P})_2\text{py}\}_2(\text{C}\equiv\text{CC}_6\text{H}_5)_4](\text{SO}_3\text{CF}_3)_2$  (**2b**) in  $d_6$ -DMSO.

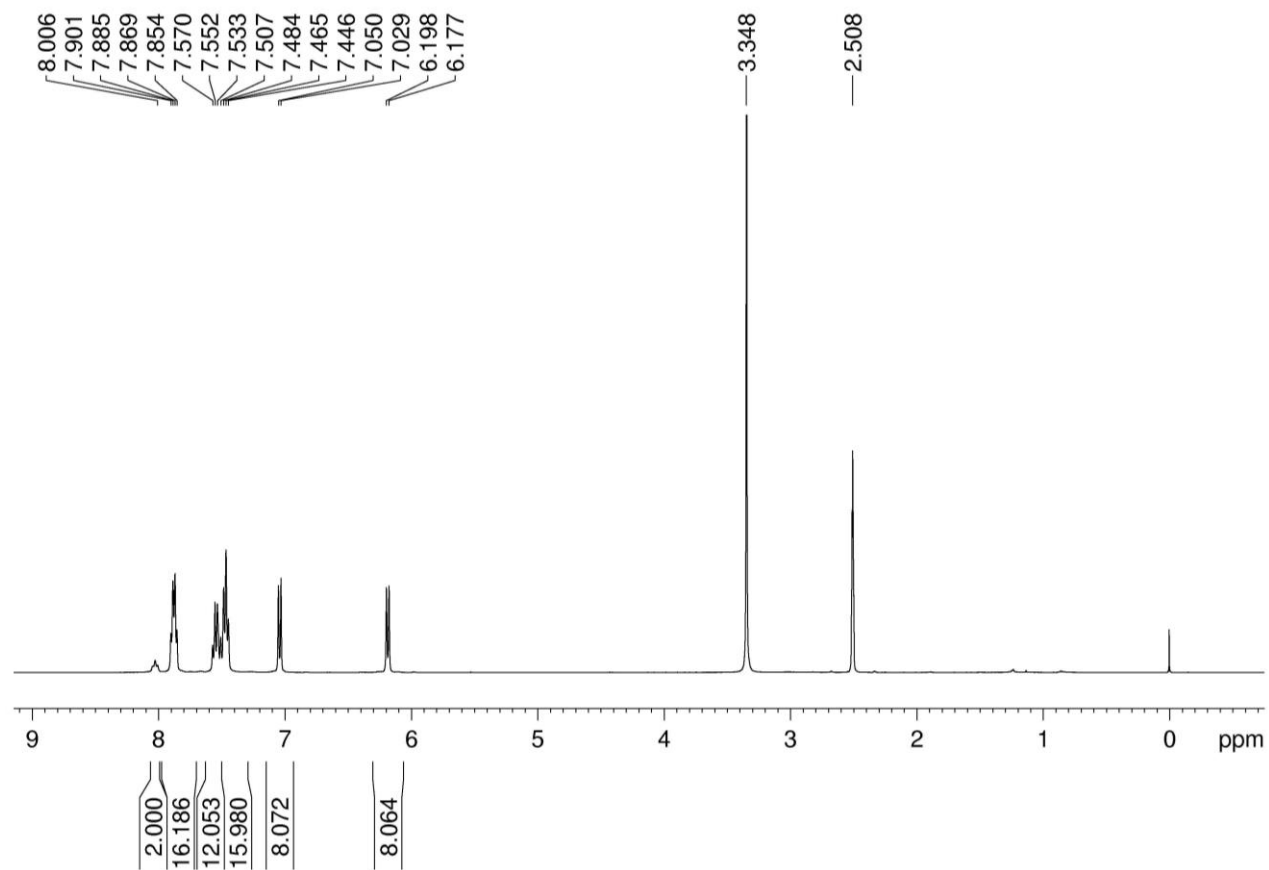

**Fig. S17**  $^1\text{H}$  NMR (400 MHz) spectrum of  $\text{trans-}[\text{Pt}_2\text{Ag}_2\{(\text{Ph}_2\text{P})_2\text{py}\}_2(\text{C}\equiv\text{CC}_6\text{H}_4\text{CF}_3\text{-4})_4](\text{SO}_3\text{CF}_3)_2$  (**3b**) in  $d_6$ -DMSO.

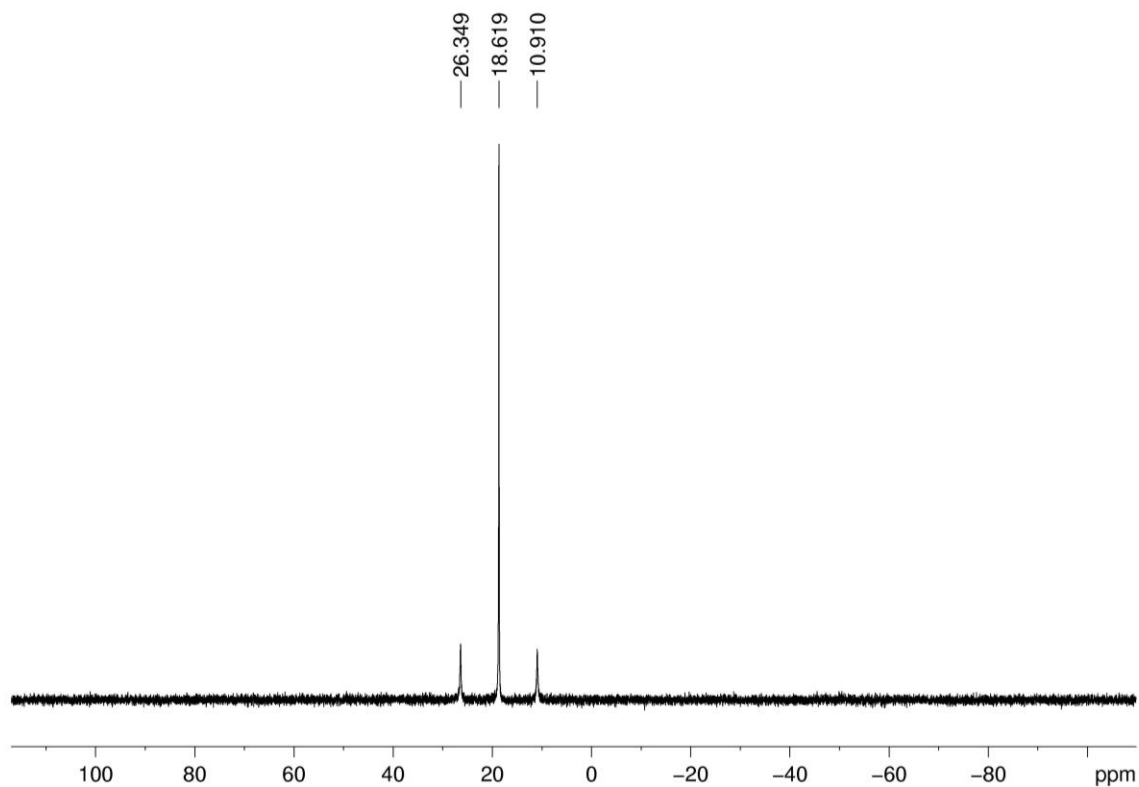

**Fig. S18**  $^{31}\text{P}$  NMR (162 MHz) spectrum of  $\text{trans-}[\text{Pt}_2\text{Ag}_2\{(\text{Ph}_2\text{P})_2\text{py}\}_2(\text{C}\equiv\text{CC}_6\text{H}_4\text{CF}_3\text{-4})_4](\text{SO}_3\text{CF}_3)_2$  (**3b**) in  $d_6$ -DMSO.

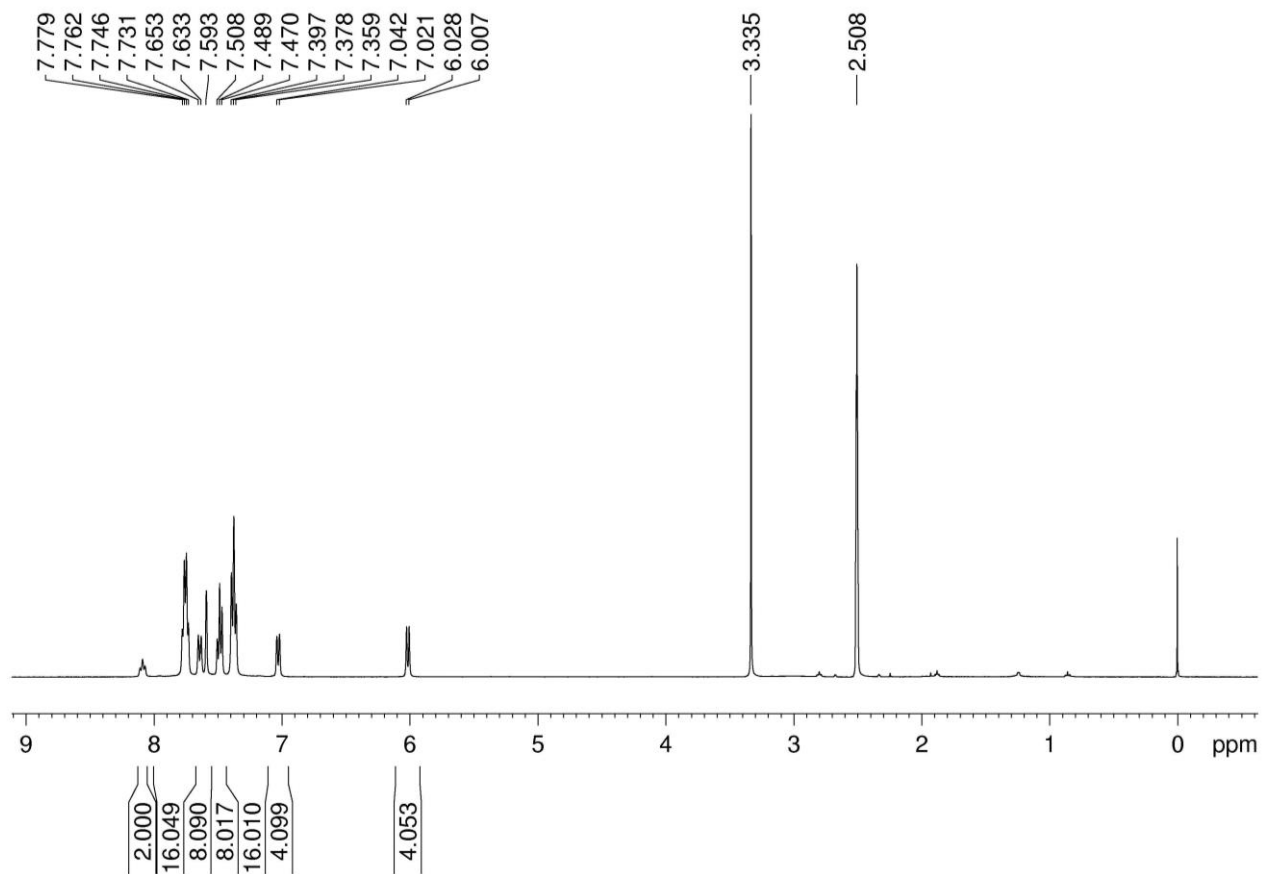

**Fig. S19**  $^1\text{H}$  NMR (400 MHz) spectrum of  $\text{trans-}[\text{Pt}_2\text{Ag}_2\{(\text{Ph}_2\text{P})_2\text{py}\}_2(\text{C}\equiv\text{CC}_6\text{H}_3(\text{CF}_3)_{2-2,4})_4](\text{SO}_3\text{CF}_3)_2$  (**4b**) in  $d_6$ -DMSO.

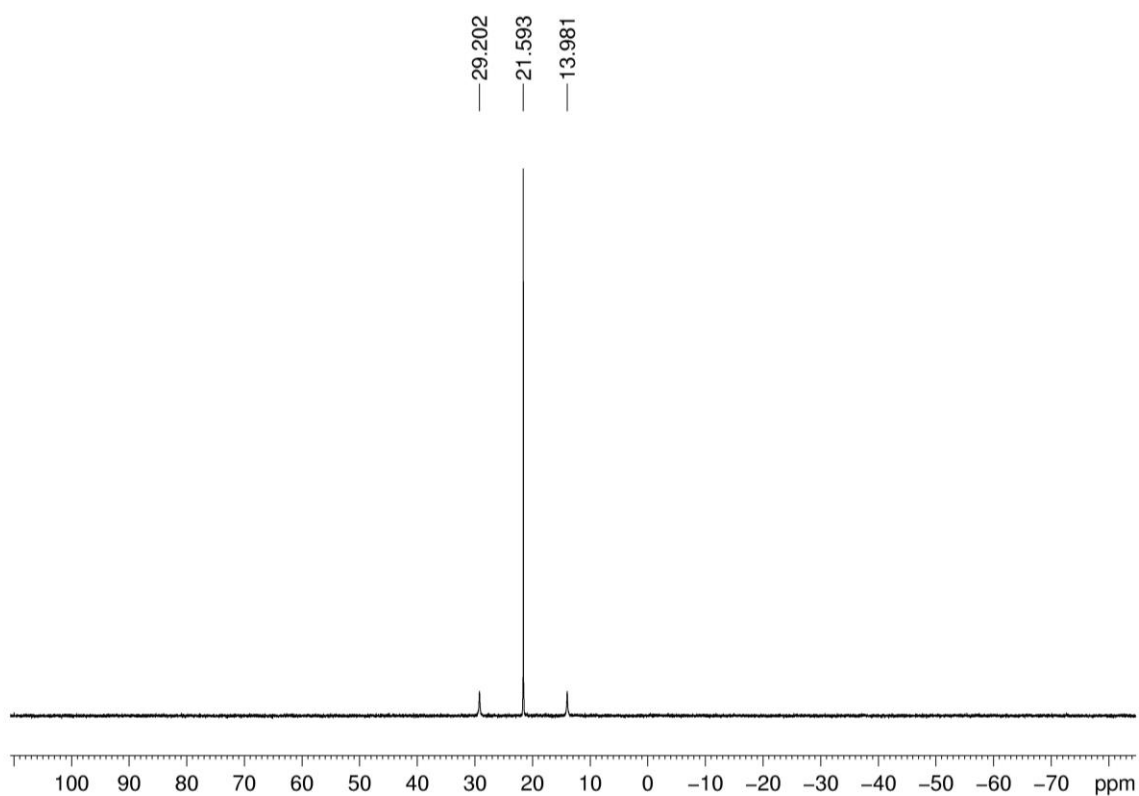

**Fig. S20**  $^{31}\text{P}$  NMR (162 MHz) spectrum of  $\text{trans-}[\text{Pt}_2\text{Ag}_2\{(\text{Ph}_2\text{P})_2\text{py}\}_2(\text{C}\equiv\text{CC}_6\text{H}_3(\text{CF}_3)_{2-2,4})_4](\text{SO}_3\text{CF}_3)_2$  (**4b**) in  $d_6$ -DMSO.

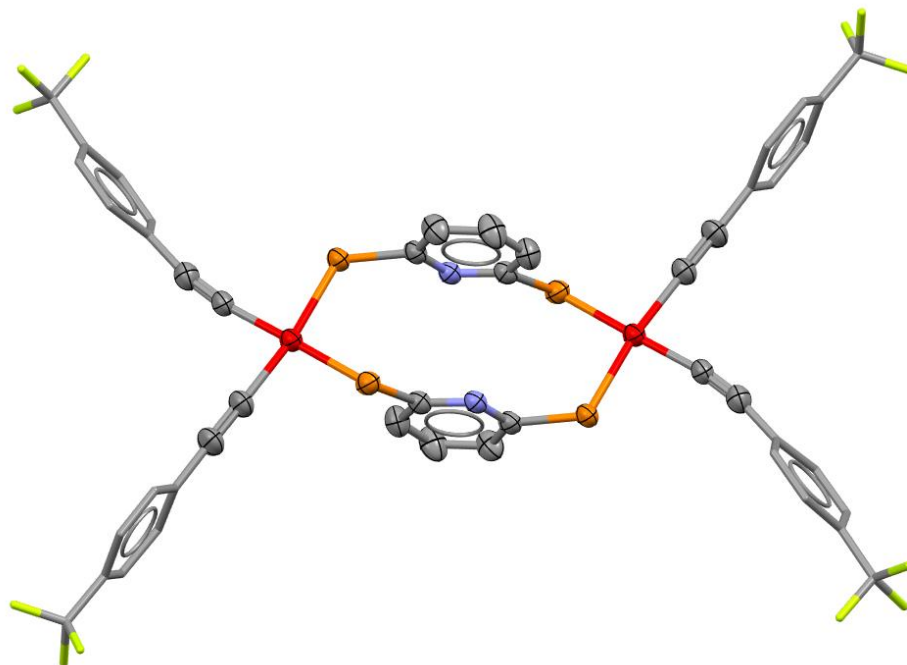

**Fig. S21** Perspective view (30% thermal ellipsoids) of cis-binuclear complex  $\text{cis-Pt}_2\{(\text{Ph}_2\text{P})_2\text{py}\}_2(\text{C}\equiv\text{CC}_6\text{H}_4\text{CF}_4-4)_4$ . The 4-trifluoromethyl-1-phenyl rings were depicted without using thermal ellipsoids. Phenyl rings on the phosphorus atoms are omitted for clarity.

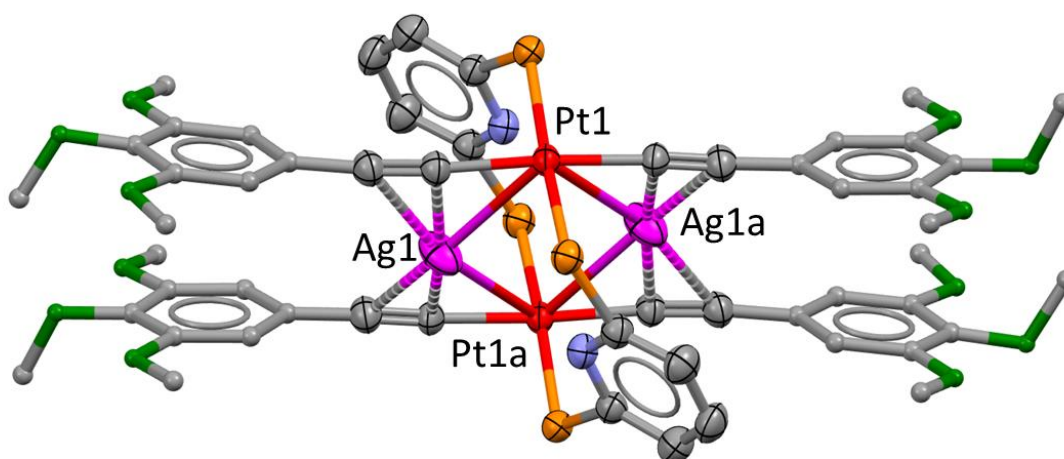

**Fig. S22** Perspective view (30% thermal ellipsoids) of trans- $\text{Pt}_2\text{Ag}_2$  complex **1b**. The 3,4,5-trimethoxy-1-phenyl rings were depicted without using thermal ellipsoids. Phenyl rings on the phosphorus atoms are omitted for clarity.

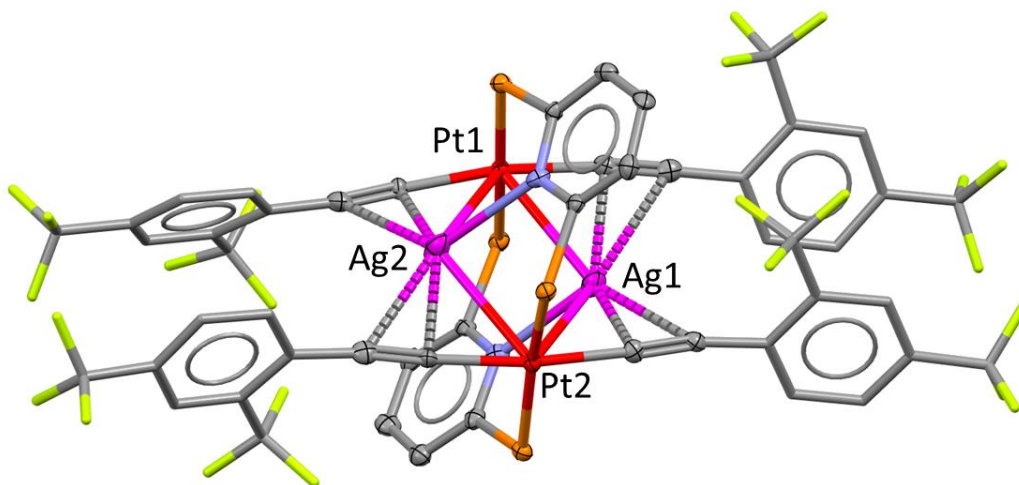

**Fig. S23** Perspective view (30% thermal ellipsoids) of trans-Pt<sub>2</sub>Ag<sub>2</sub> complex **4b**. The 2,4-bis(trifluoromethyl)-1-phenyl rings were depicted without using thermal ellipsoids. Phenyl rings on the phosphorus atoms are omitted for clarity.

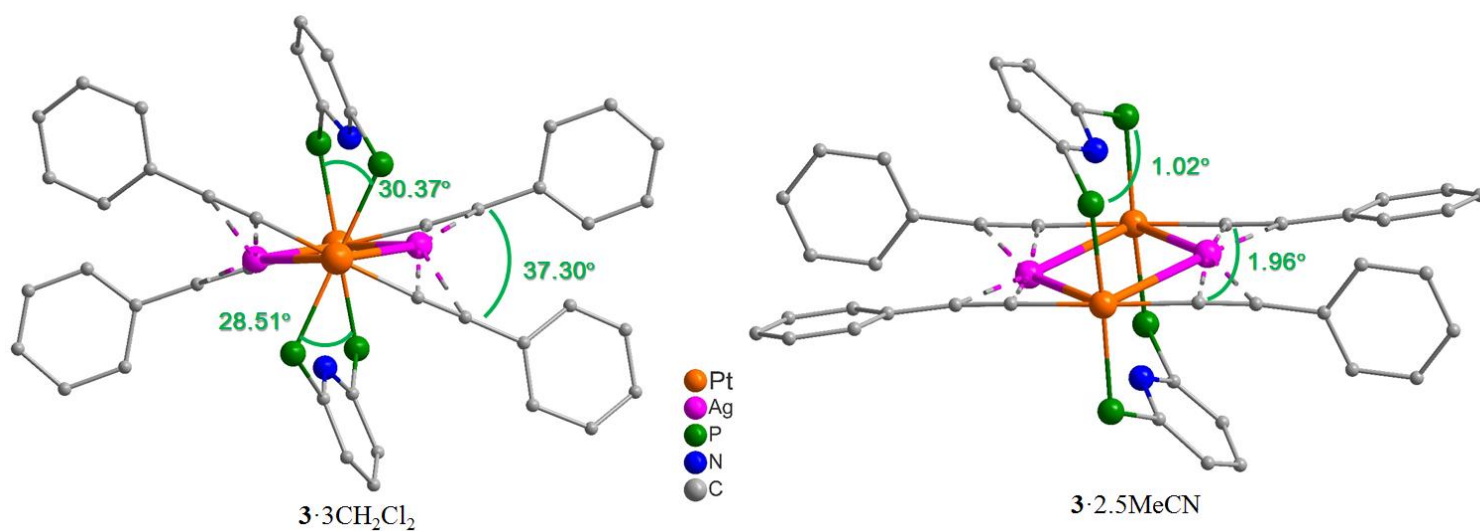

**Fig. S24** Dihedral angles in crystal structures of **2b**·3CH<sub>2</sub>Cl<sub>2</sub> (left) and **2b**·2.5MeCN (right).

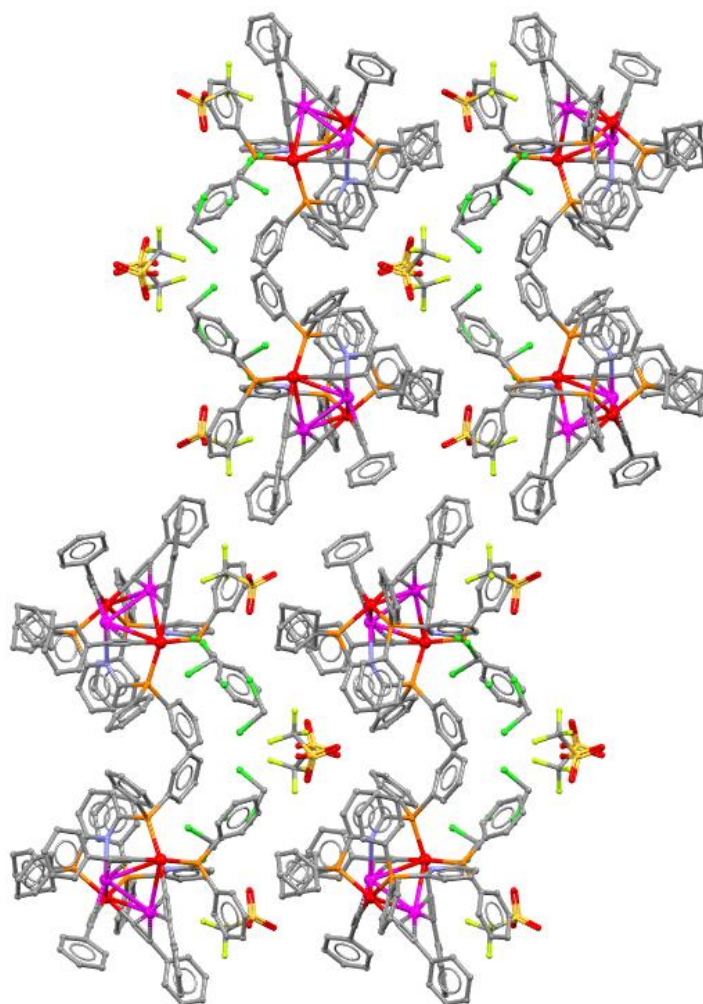

**Fig. S25** A view of crystal packing of **2a**·11/4CH<sub>2</sub>Cl<sub>2</sub> along a-axis.

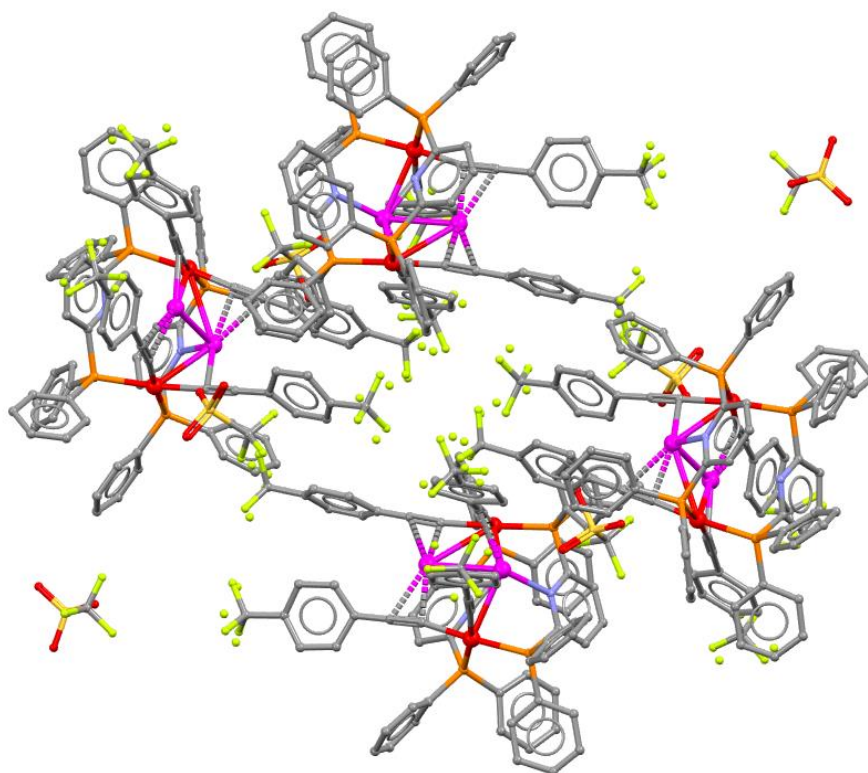

**Fig. S26** A view of crystal packing of **3a**·5/2CH<sub>2</sub>Cl<sub>2</sub> along b-axis.



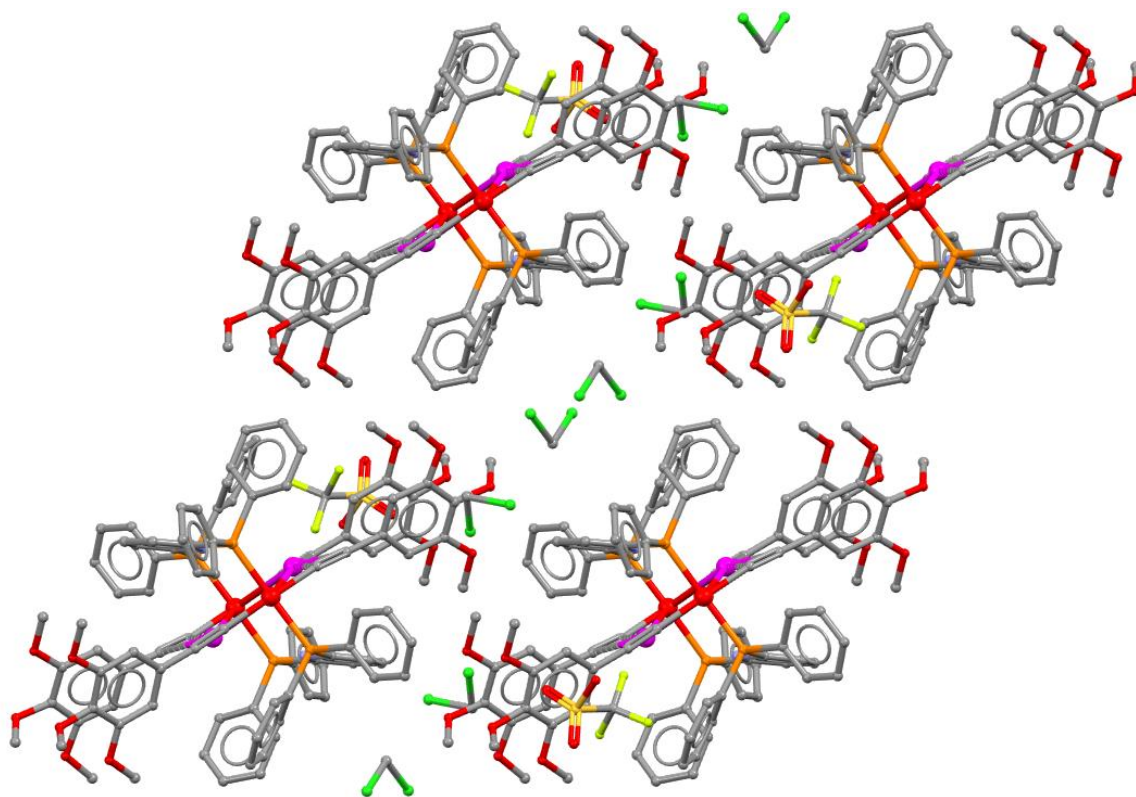

**Fig. S27** A view of crystal packing of **1b**·4CH<sub>2</sub>Cl<sub>2</sub> along a-axis.

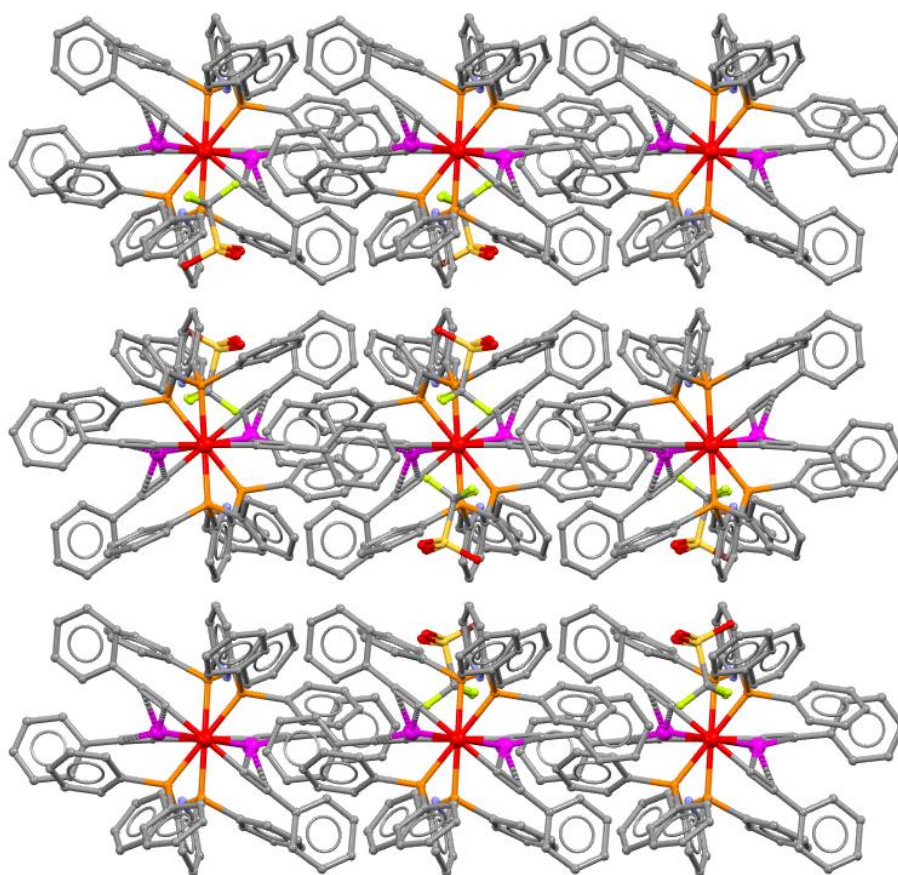

**Fig. S28** A view of crystal packing of **2b** along a-axis.



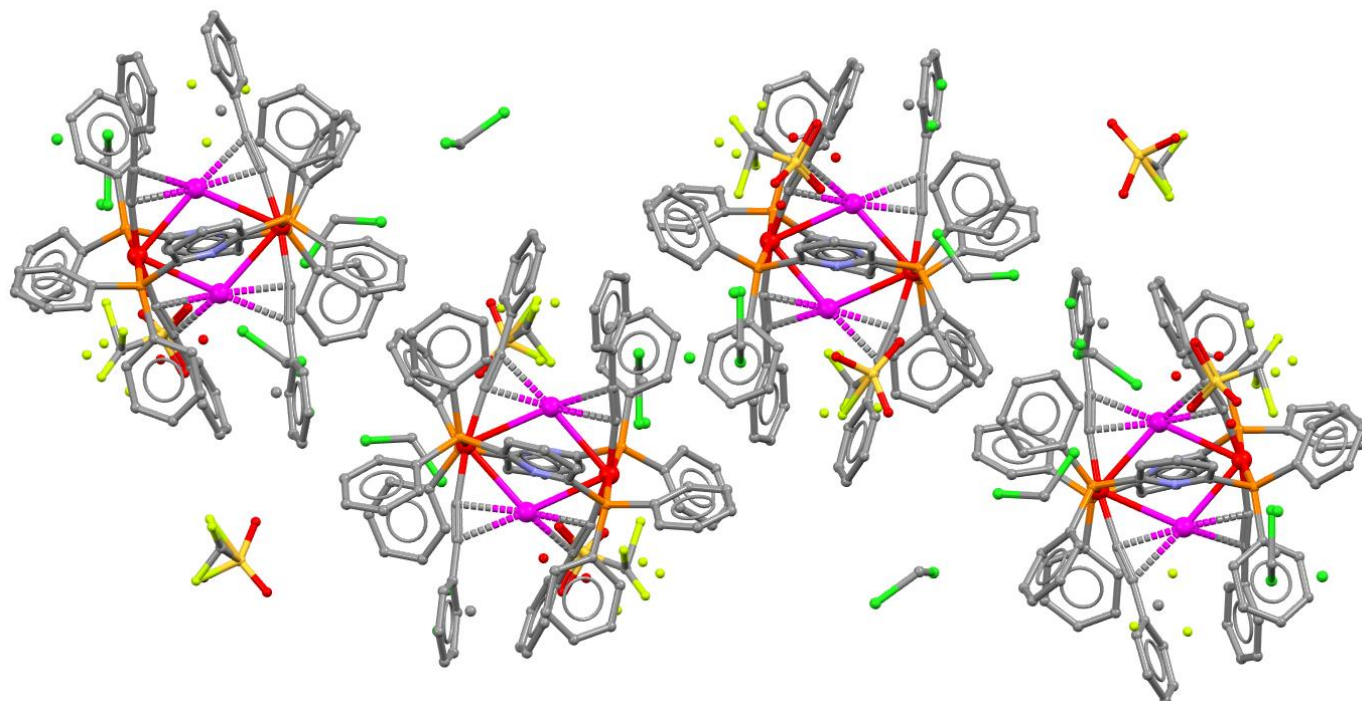

**Fig. S29.** A view of crystal packing of **2b**·3CH<sub>2</sub>Cl<sub>2</sub> along a-axis.

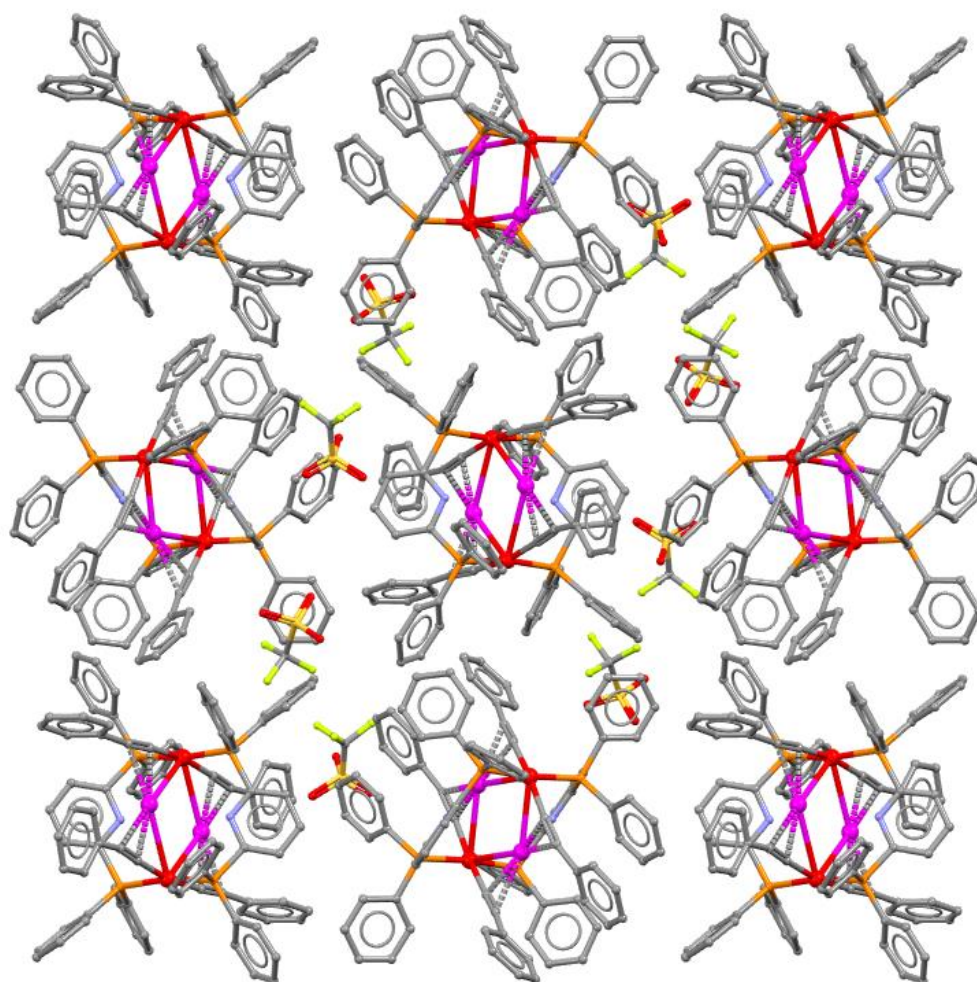

**Fig. S30.** A view of crystal packing of **2b**·2.5MeCN along a-axis.

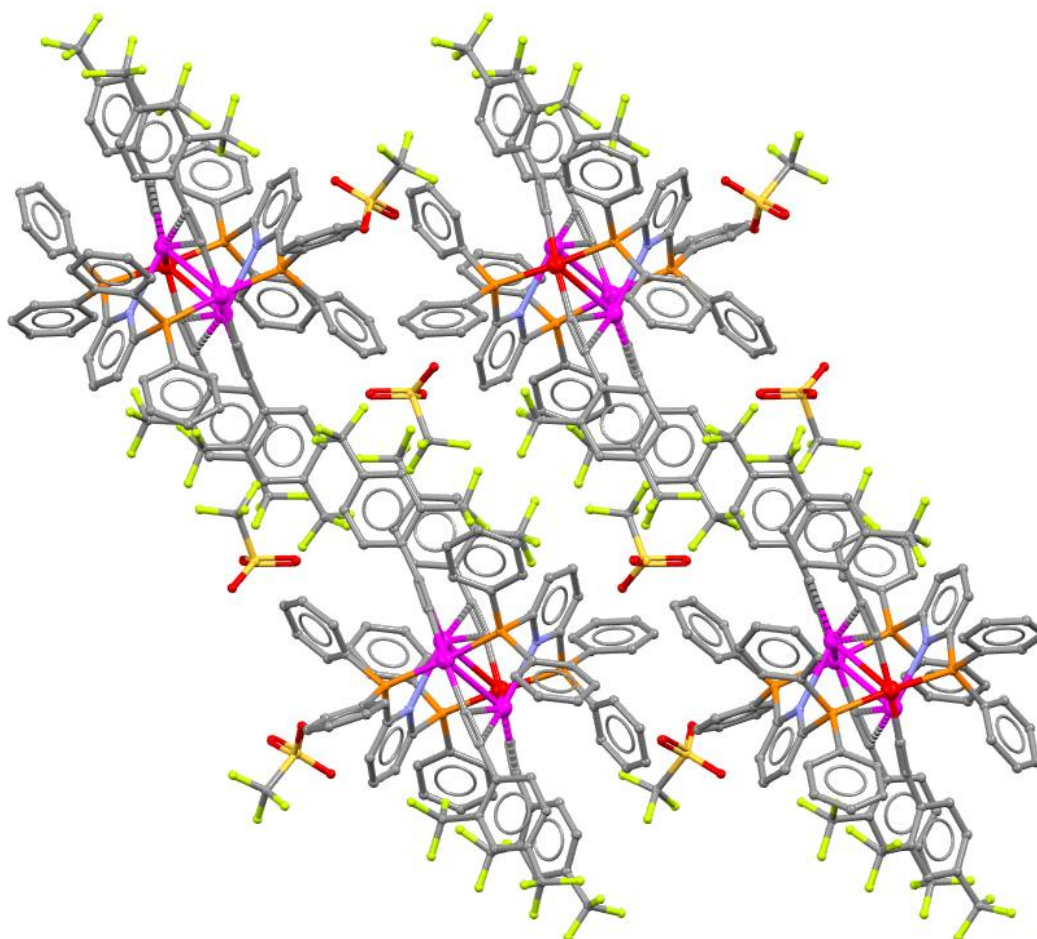

**Fig. S31.** A view of crystal packing of **4b** along b-axis.

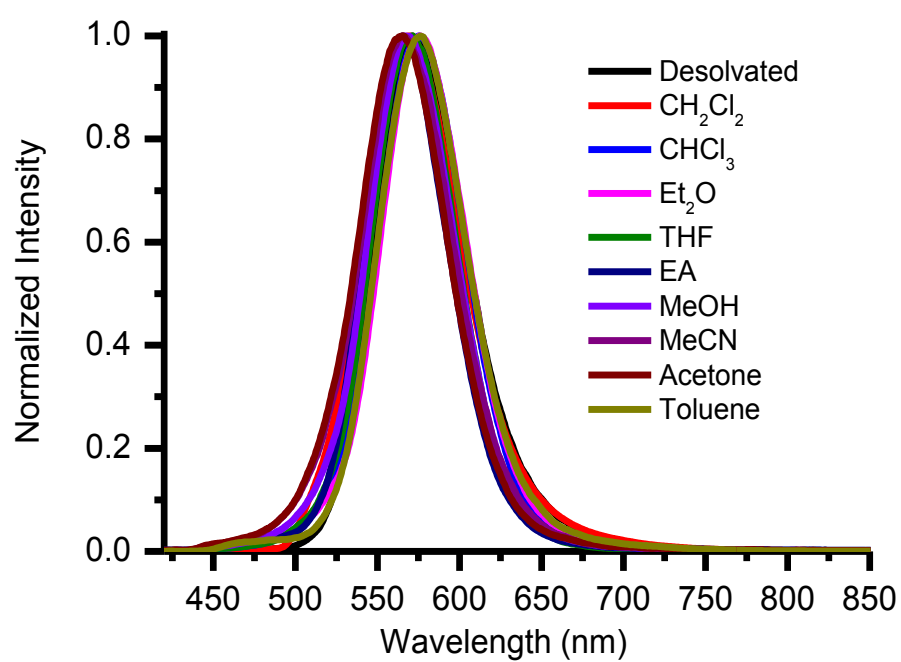

**Fig. S32** Emission spectra of solid-state **1b** with various vapours at ambient temperature.

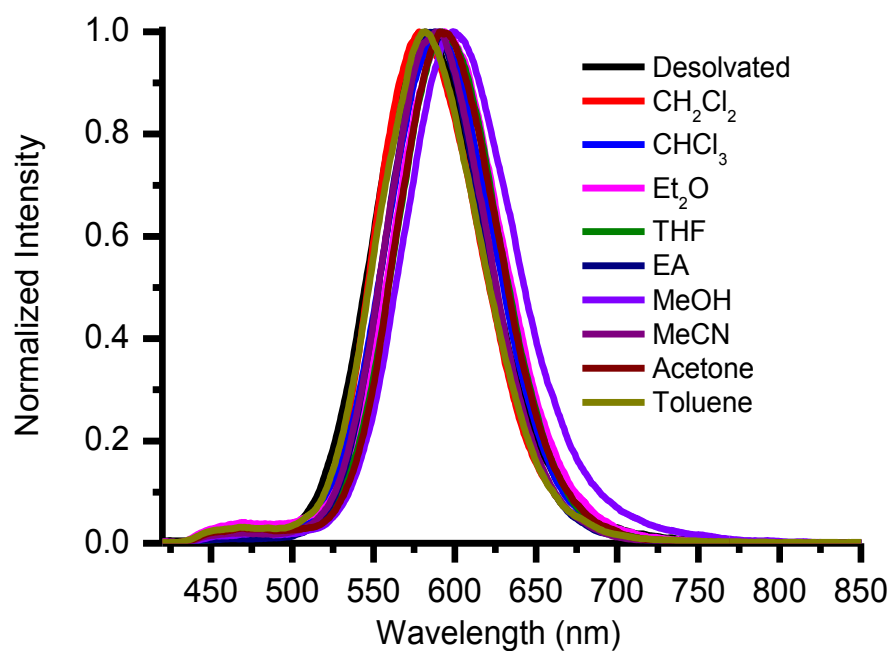

**Fig. S33** Emission spectra of solid-state **3b** with various vapours at ambient temperature.

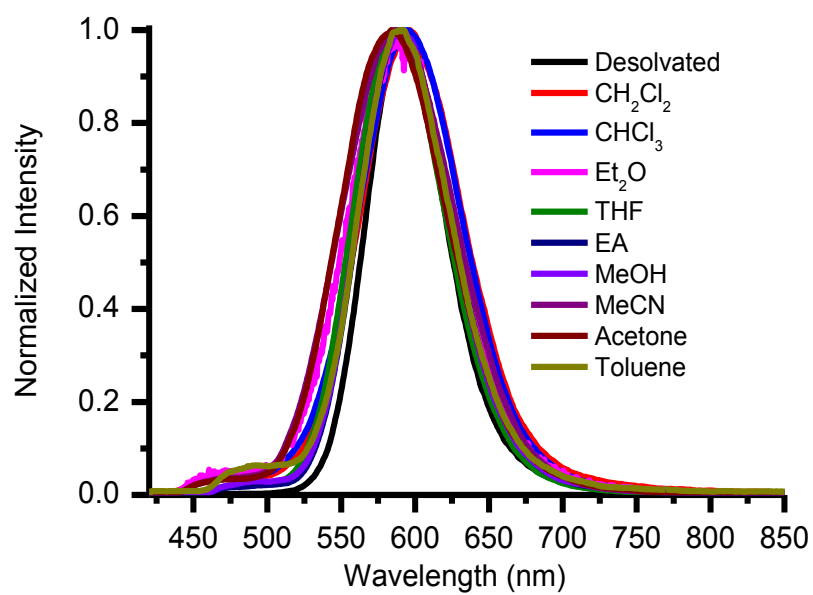

**Fig. S34** Emission spectra of solid-state **4b** with various vapours at ambient temperature.

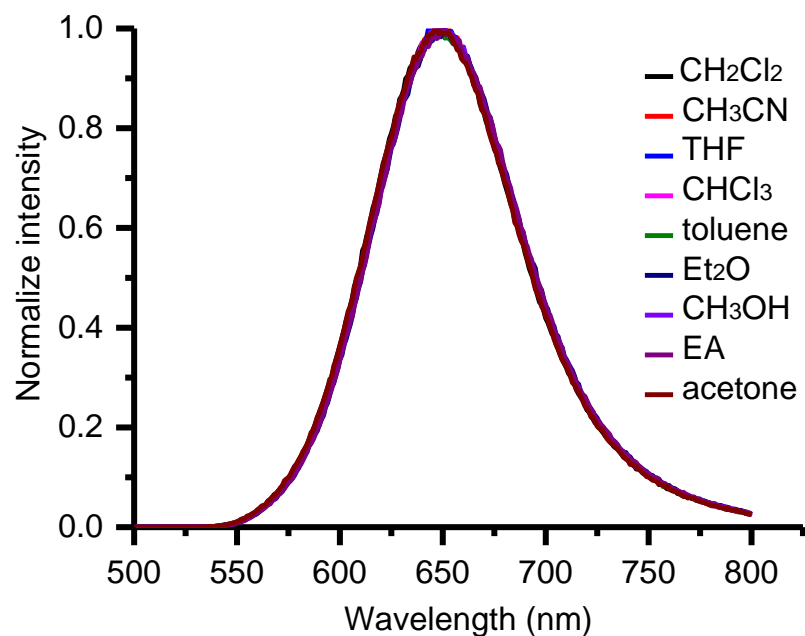

**Fig. S35** Emission spectra of the PMMA film doped with 3% **1b** upon exposure to various vapours at ambient temperature.

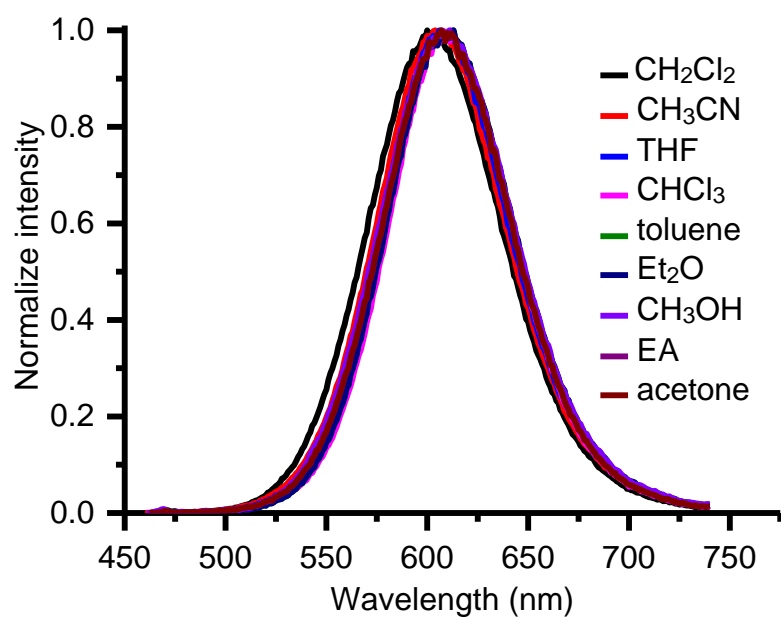

**Fig. S36** Emission spectra of the PMMA film doped with 3% **3b** upon exposure to various vapours at ambient temperature.

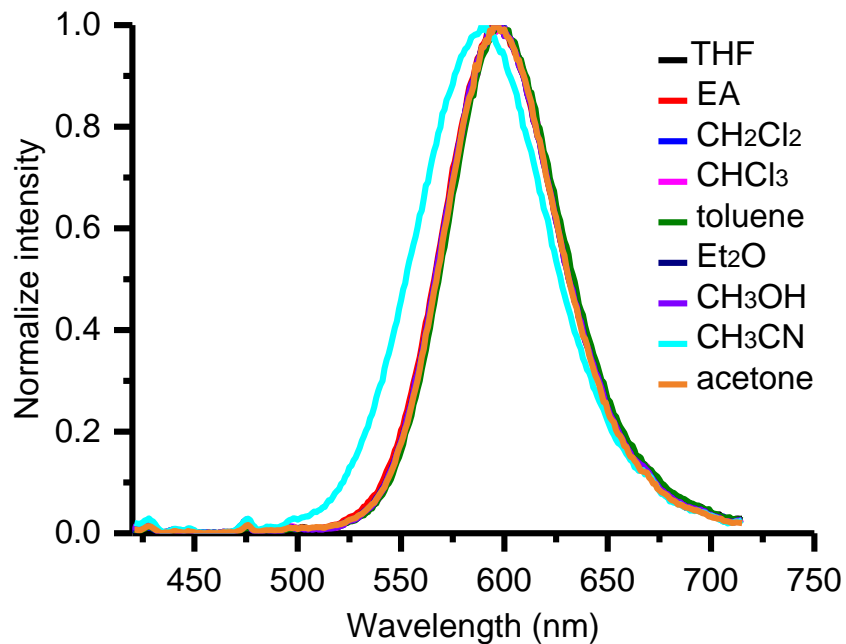

**Fig. S37** Emission spectra of the PMMA film doped with 3% **4b** upon exposure to various vapours at ambient temperature.

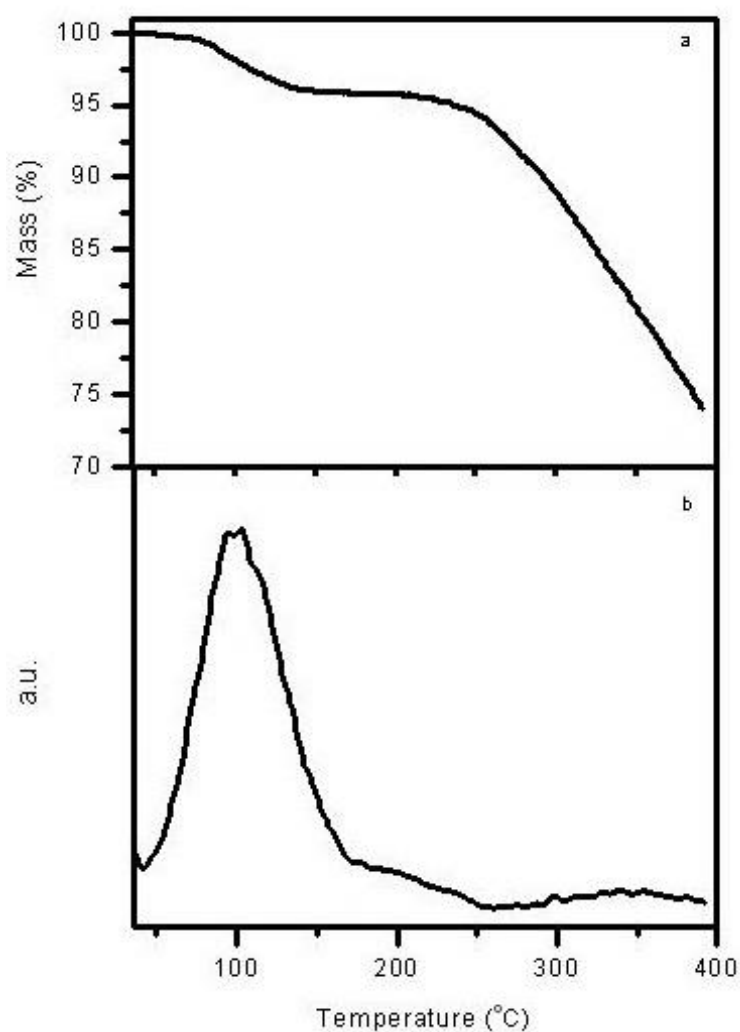

**Fig. S38** Thermal gravitational curve (a) and quadrupole mass spectrometry (b) for crystalline sample **2b·2.5MeCN** showing weight loss of solvate MeCN.



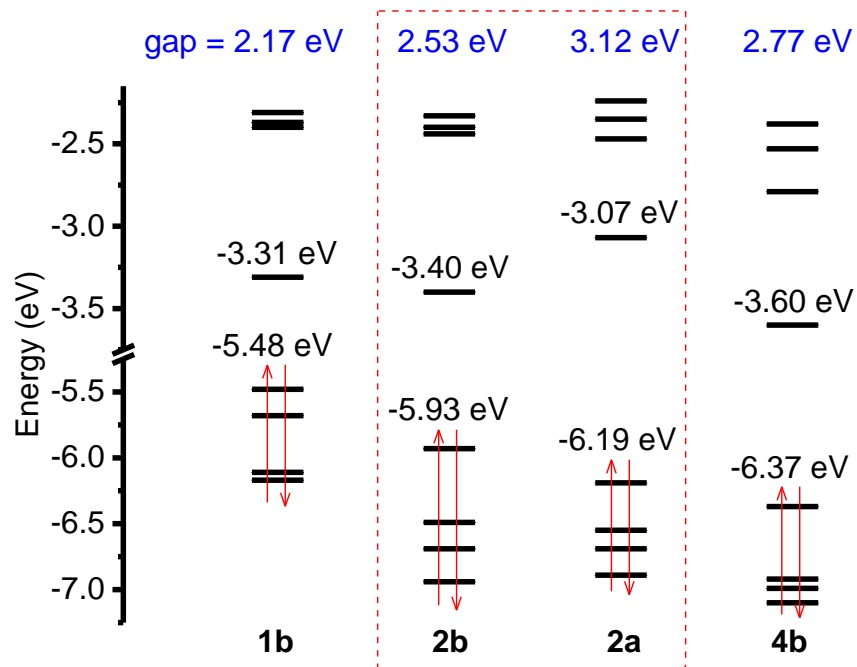

**Fig. S39** Plots of energy level of frontier molecular orbitals in the lowest-energy triplet states for complexes **2a**, **1b**, **2b**, and **4b**, respectively, in the CH<sub>2</sub>Cl<sub>2</sub> solution calculated by TD-DFT method at the B3LYP level.

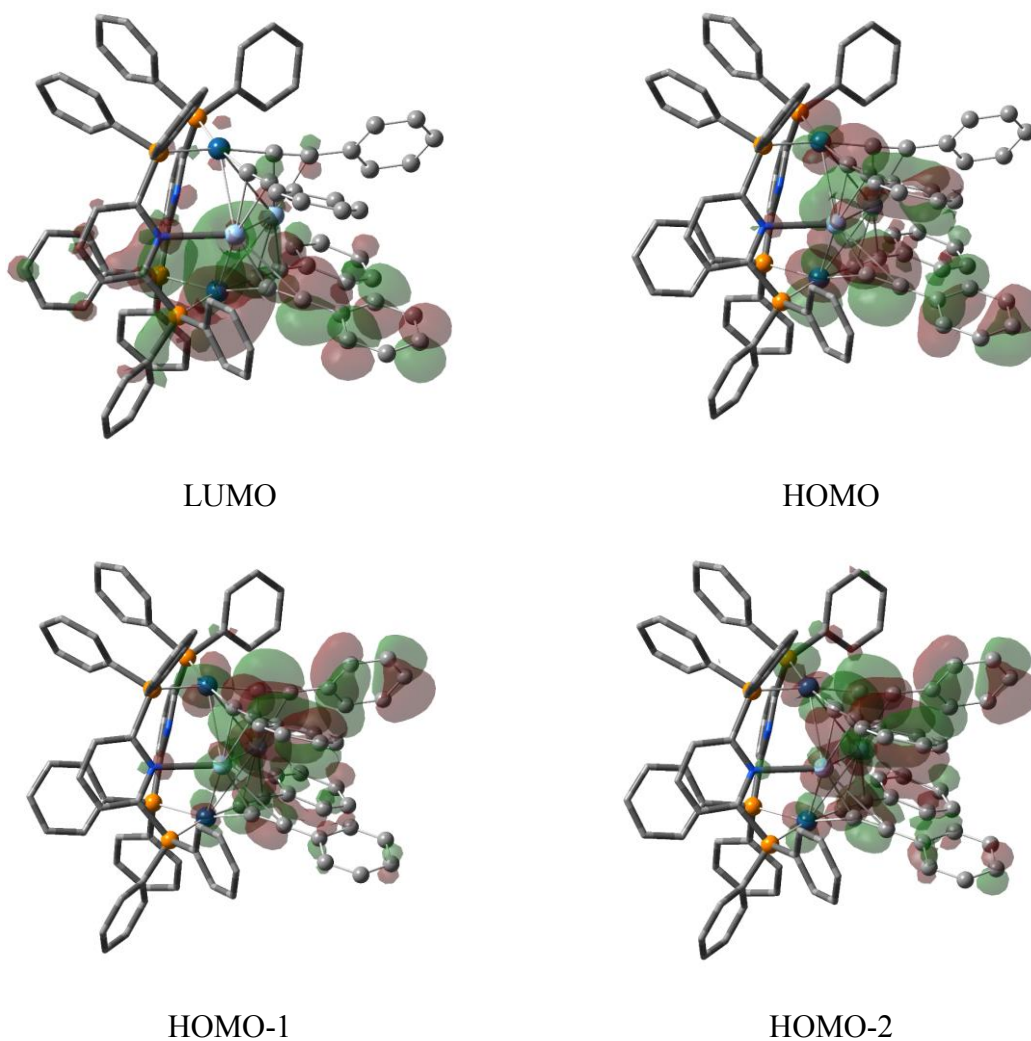

**Fig. S40** Plots of the frontier molecular orbitals involved in the emission transition for complex **2a** by TD-DFT method at the B3LYP level (isovalue = 0.02).

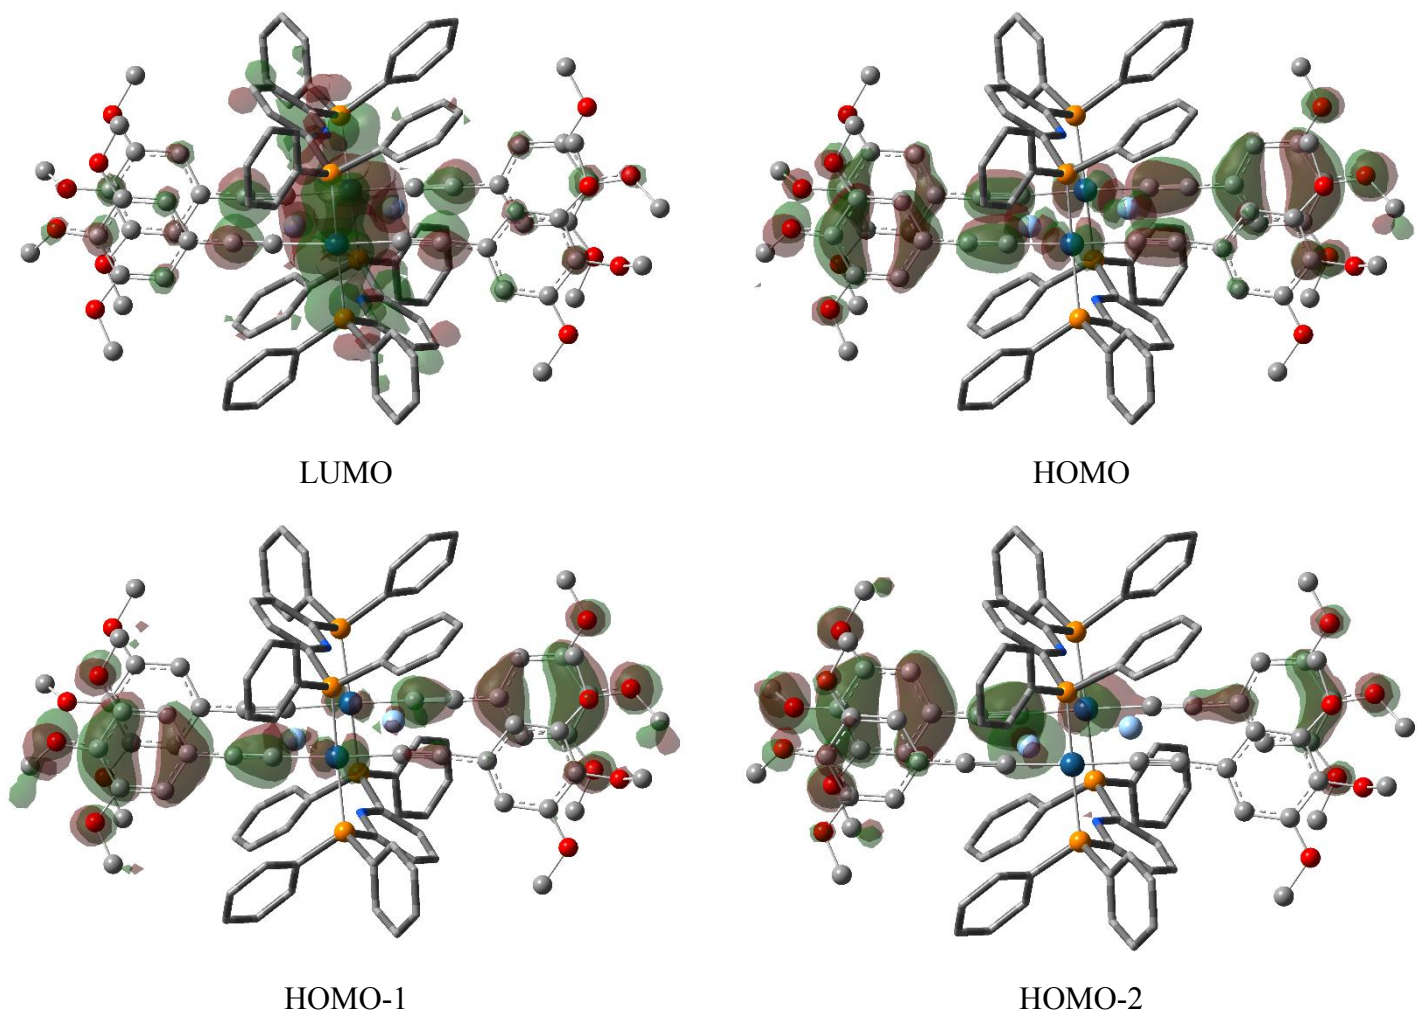

**Fig. S41** Plots of the frontier molecular orbitals involved in the emission transition for complex **1b** by TD-DFT method at the B3LYP level (isovalue = 0.02).

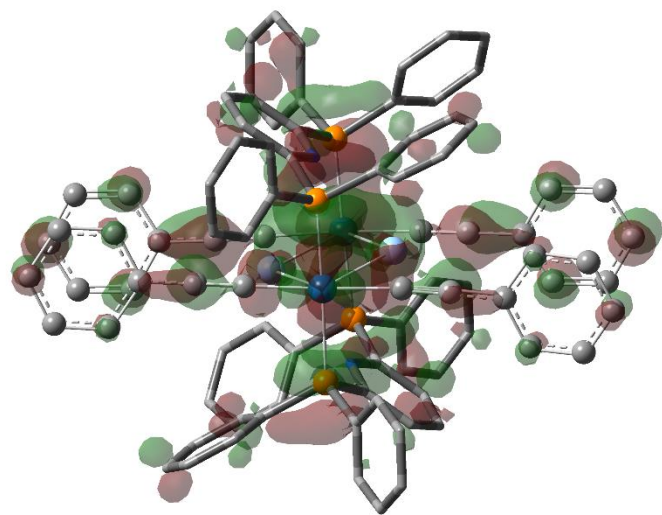

LUMO+1

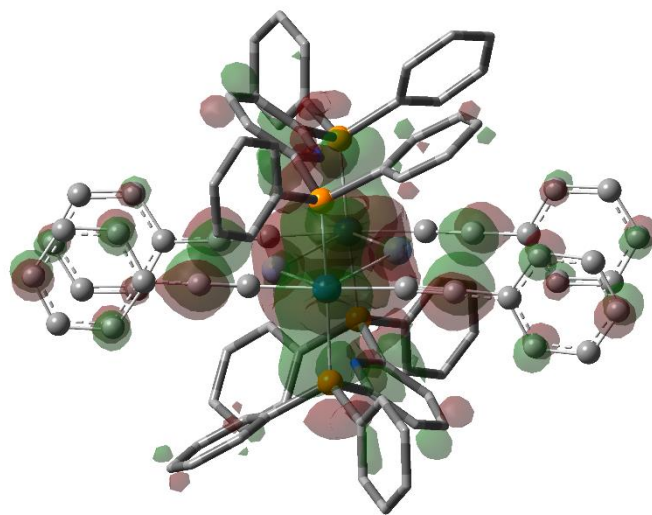

LUMO

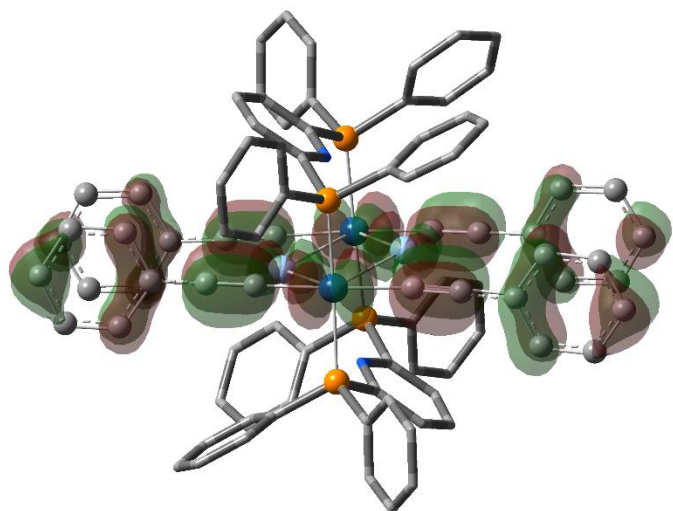

HOMO

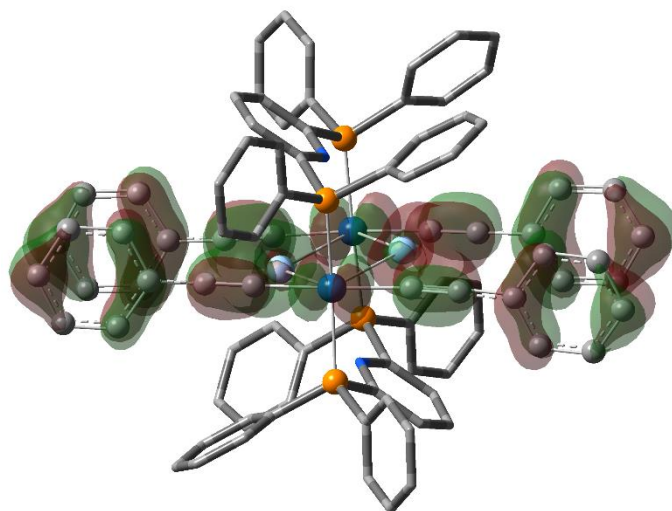

HOMO-1

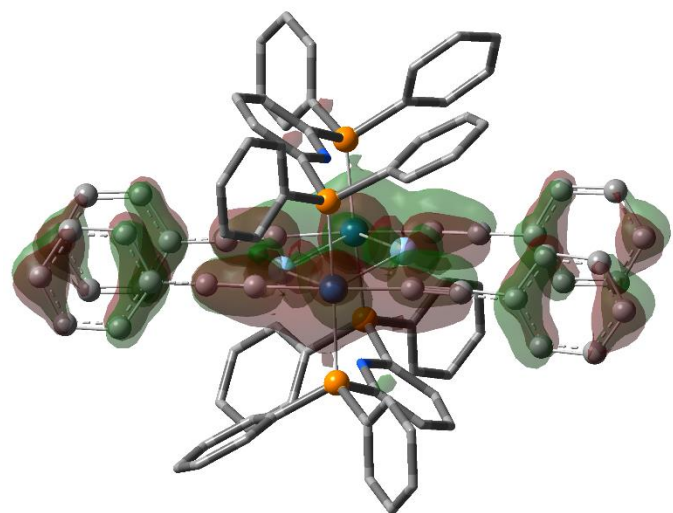

HOMO-2

**Fig. S42** Plots of the frontier molecular orbitals involved in the emission transition for complex **2b** by TD-DFT method at the B3LYP level (isovalue = 0.02).



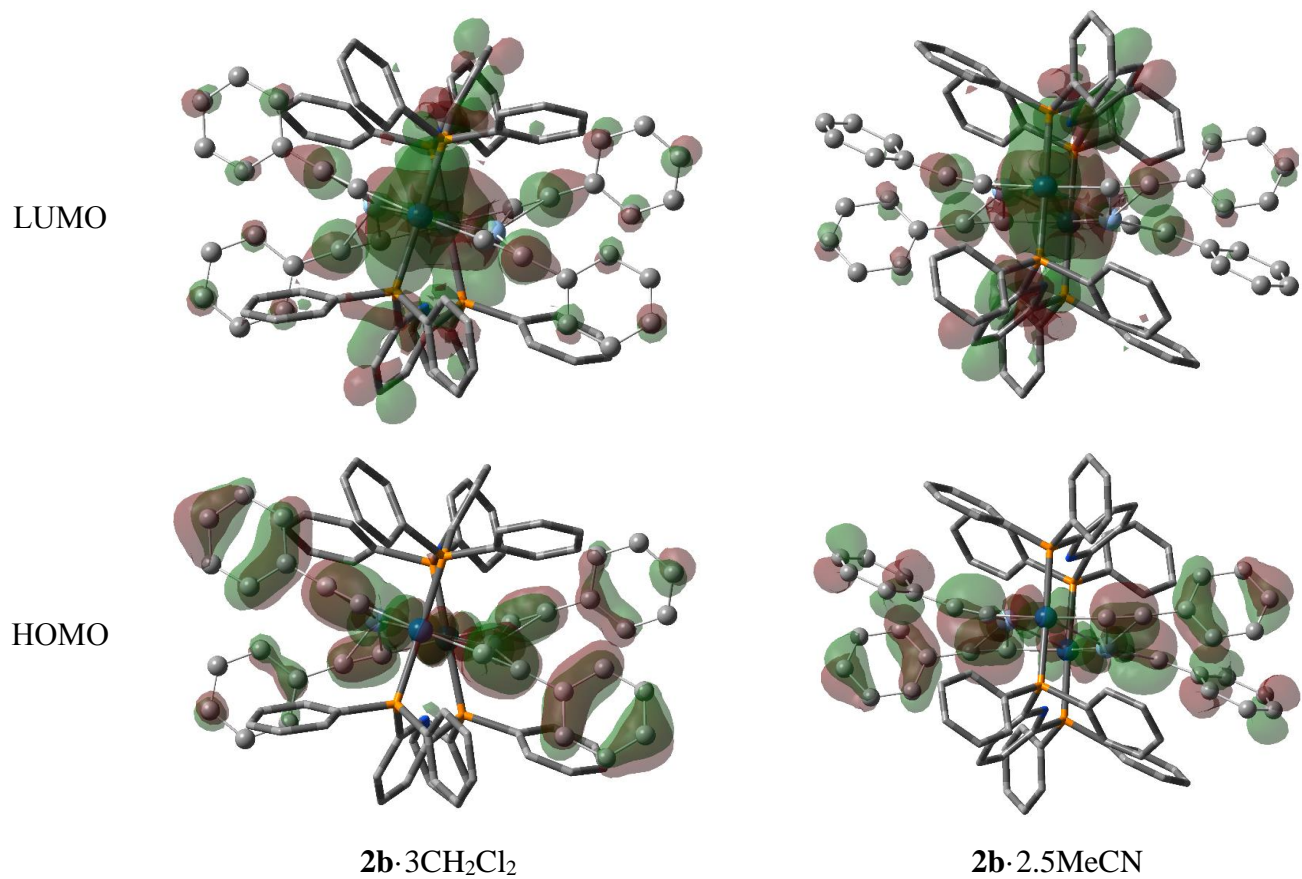

**Fig. S43** Plots of the frontier molecular orbitals for **2b**·3CH<sub>2</sub>Cl<sub>2</sub> and **2b**·2.5MeCN in the crystal states calculated by TD-DFT Method at the B3LYP Level (isovalue = 0.02).

## References

- 1 D. Reddy, D. Jaganyi, *Dalton. Trans.*, 2008, 6724.
- 2 J. Benito, J. R. Berenguer, J. Forniés, B. Gil, J. Gómez, E. Lalinde, *Dalton. Trans.*, 2003, 4331.
- 3 R. Severin, J. Reimer, S. Doye, *J. Org. Chem.*, 2010, **75**, 3518.
- 4 G. M. Sheldrick, *SHELXL-97, Program for the Refinement of Crystal Structures*; University of Göttingen: Göttingen, Germany, **1997**.
- 5 M. J. Frisch, G. W. Trucks, H. B. Schlegel, G. E. Scuseria, M. A. Robb, J. R. Cheeseman, G. Scalmani, V. Barone, B. Mennucci, G. A. Petersson, H. Nakatsuji, M. Caricato, X. Li, H. P. Hratchian, A. F. Izmaylov, J. Bloino, G. Zheng, J. L. Sonnenberg, M. Hada, M. Ehara, K. Toyota, R. Fukuda, J. Hasegawa, M. Ishida, T. Nakajima, Y. Honda, O. Kitao, H. Nakai, T. Vreven, J. A. Montgomery, Jr., J. E. Peralta, F. Ogliaro, M. Bearpark, J. J. Heyd, E. Brothers, K. N. Kudin, V. N. Staroverov, T. Keith, R. Kobayashi, J. Normand, K. Raghavachari, A. Rendell, J. C. Burant, S. S. Iyengar, J. Tomasi, M. Cossi, N. Rega, J. M. Millam, M. Klene, J. E. Knox, J. B. Cross, V. Bakken, C. Adamo, J. Jaramillo, R. Gomperts, R. E. Stratmann, O. Yazyev, A. J. Austin, R. Cammi, C. Pomelli, J. W. Ochterski, R. L. Martin, K. Morokuma, V. G. Zakrzewski, G. A. Voth, P. Salvador, J. J. Dannenberg, S. Dapprich, A. D. Daniels, O. Farkas, J. B. Foresman, J. V. Ortiz, J. Cioslowski, D. J. Fox, *Gaussian 09, revision D.01*. Gaussian, Inc., Wallingford CT, 2013.
- 6 A. D. Becke, *J. Chem. Phys.*, 1993, **98**, 5648.
- 7 R. Bauernschmitt, R. Ahlrichs, *Chem. Phys. Lett.*, 1996, **256**, 454.
- 8 M. E. Casida, C. Jamorski, K. C. Casida, D. R. Salahub, *J. Chem. Phys.*, 1998, **108**, 4439.
- 9 R. E. Stratmann, G. E. Scuseria, M. J. Frisch, *J. Chem. Phys.*, 1998, **109**, 8218.
- 10 V. Barone, M. Cossi, J. Tomasi, *J. Chem. Phys.*, 1997, **107**, 3210.
- 11 M. Cossi, G. Scalmani, N. Rega, V. Barone, *J. Chem. Phys.*, 2002, **117**, 43.
- 12 D. Andrae, U. Häussermann, M. Dolg, H. Stoll, H. Preuss, *Theor. Chim. Acta.*, 1990, **77**, 123.
- 13 P. Ros, G. C. A. Schuit, *Theo. Chim. Acta (Berl.)*, 1966, **4**, 1.
- 14 T. Lu, F. W. Chen, *J. Comp. Chem.*, 2012, **33**, 580.
